# Supplementary material
Source: PubMed Central journal article supplement (PMC8988019)
Supplement: jamasurg-e220135-s001.pdf [file jamasurg-e220135-s001.pdf]

## Supplemental Online Content

Offodile AC II, Lin YL, Melamed A, Rauh-Hain JA, Kinzer D, Keating NL. Association of Maryland global budget revenue with spending and outcomes related to surgical care for Medicare beneficiaries with cancer. *JAMA Surg*. Published online April 6, 2022.  
doi:10.1001/jamasurg.2022.0135

### eMethods.

- A. Identify hospitals providing cancer surgeries in 2013
- B. Study cohort selection
- C. Model specification for estimating difference-in-differences
- D. Counterfactual assumption
- E. Surgery codes for identifying cancer surgeries

**eTable 1.** Selection of cancer surgery episodes in 2013 in Maryland and control states

**eTable 2.** Patient characteristics in the main cohort (all inpatient and outpatient cancer surgical episodes from Maryland and matched control hospitals)

**eTable 3.** Characteristics of patients receiving a major cancer surgery

**eFigure 1.** Annual difference-in-differences estimates: main cohort

**eFigure 2.** Annual difference-in-differences estimates: inpatient major cancer surgery subcohort

**eTable 4.** Surgery codes for identifying cancer surgeries

### eReferences

This supplemental material has been provided by the authors to give readers additional information about their work.

## A. Identify hospitals providing cancer surgeries in 2013

**eTable 1. Selection of cancer surgery episodes in 2013 in Maryland and control states**

|                                                                                                                                                                                                         | Maryland    |               | Control states |               |
|---------------------------------------------------------------------------------------------------------------------------------------------------------------------------------------------------------|-------------|---------------|----------------|---------------|
|                                                                                                                                                                                                         | N, patients | %, prior step | N, patients    | %, prior step |
| Select Medicare beneficiaries residing in Maryland and control states <sup>#</sup> , who had cancer-related surgery <sup>†</sup> in a short term hospital within the same state as their residence.     | 3,893       |               | 6,359          |               |
| For Maryland, exclude those whose surgery performed in the 10 hospitals in the TPR program <sup>‡</sup> .                                                                                               | 3,525       | 90.5%         | 6,359          | 100.0%        |
| Select those who were 66 or older at the surgery.                                                                                                                                                       | 3,026       | 85.8%         | 5,262          | 82.7%         |
| Select those who had continuous parts A&B without managed care enrollment in the 12 months before surgery admission and 30 days after discharge or till death if they died within 30 days of discharge. | 2,634       | 87.0%         | 4,735          | 90.0%         |
| Exclude surgery claims not reimbursed by Medicare                                                                                                                                                       | 2,619       | 99.4%         | 4,710          | 99.5%         |

<sup>#</sup>Including Arizona, Arkansas, California, Colorado, Connecticut, Delaware, District of Columbia, Hawaii, Illinois, Iowa, Kentucky, Massachusetts, Minnesota, Nevada, New Jersey, New Mexico, New York, North Dakota, Ohio, Oregon, Rhode Island, Vermont, Washington, and West Virginia. For Maryland, West Virginia, Delaware, and DC, 100% Medicare data were available; for other states, 5% data were available.

<sup>†</sup>Identified from inpatient and outpatient claims using surgery codes in Oncology Care Model (ref 1) and additional codes from literature (ref 2). Codes for reconstruction or repair procedures were not used. All surgery claims need to be accompanied with a cancer diagnosis code (ref 1) as the primary diagnosis. The complete list of surgery codes is at the end of the supplement (eTable 4). Emergent surgeries were not included.

<sup>‡</sup>TPR=Total Patient Revenue.

At the end of the selection, there were 35 hospitals from Maryland and 805 hospitals from control states. We used the greedy nearest neighbor matching technique to match these two groups of hospitals by the propensity of being a Maryland hospital, estimated by a logistic regression model which included the hospital characteristics in 2013: total beds, resident to bed ratio, disproportionate share hospital patient percent, percent capacity (average daily census divided by total beds), transfer-adjusted case mix, total inpatient surgical operations, total outpatient surgical operations, nurse staffing ratio (ref 3), and medical school affiliation.

## B. Study cohort selection

We followed the same selection process in eTable 1 to identify patients with cancer surgery at the 136 matched hospitals (35 in Maryland and 101 in control states) between January 2011 and November 2018. At the end of the selection, for each Maryland hospital, we made sure its matched controls had data from the same data years and vice versa. For example, if a Maryland hospital has data between 2011 and 2016 while its matched control hospitals have data between 2012 and 2018, the data between 2012 and 2016 for this matched set of hospitals would be included in the analysis. With this restriction, all matched sets still had data from both pre- and post-GBR periods.

eTable 2 shows the number of patients receiving a cancer surgery in Maryland and matched control hospitals by year as well as their characteristics. eTable 3 shows the characteristics of patients receiving an inpatient major cancer surgery (ref 2, eTable 4).

eTable 2. Patient characteristics in the main cohort (all inpatient and outpatient cancer surgical episodes from Maryland and matched control hospitals)

| Patient characteristic                                 | Maryland     | Control states | Abs. std. diff. |
|--------------------------------------------------------|--------------|----------------|-----------------|
|                                                        | n= 20320     | n= 4737        |                 |
|                                                        | n (%)        |                |                 |
| <b>Surgery year</b>                                    |              |                |                 |
| 2011                                                   | 2296 (11.3)  | 663 (14.0)     |                 |
| 2012                                                   | 2299 (11.3)  | 588 (12.4)     |                 |
| 2013                                                   | 2619 (12.9)  | 638 (13.5)     |                 |
| 2014                                                   | 2634 (13.0)  | 614 (13.0)     |                 |
| 2015                                                   | 2594 (12.8)  | 605 (12.8)     |                 |
| 2016                                                   | 2717 (13.4)  | 566 (11.9)     |                 |
| 2017                                                   | 2684 (13.2)  | 564 (11.9)     |                 |
| 2018, Jan-Nov                                          | 2477 (12.2)  | 499 (10.5)     |                 |
| <b>Age at surgery</b>                                  |              |                | 0.04            |
| 66-69                                                  | 5087 (25.0)  | 1193 (25.2)    |                 |
| 70-74                                                  | 5897 (29.0)  | 1385 (29.2)    |                 |
| 75-79                                                  | 4397 (21.6)  | 1032 (21.8)    |                 |
| 80-84                                                  | 2980 (14.7)  | 665 (14.0)     |                 |
| 85+                                                    | 1959 (9.6)   | 462 (9.8)      |                 |
| <b>Sex</b>                                             |              |                | 0.02            |
| Male                                                   | 6252 (30.8)  | 1414 (29.9)    |                 |
| Female                                                 | 14068 (69.2) | 3323 (70.1)    |                 |
| <b>Race</b>                                            |              |                | 0.48            |
| NH white                                               | 15142 (74.5) | 4265 (90.0)    |                 |
| NH Black                                               | 4106 (20.2)  | 245 (5.2)      |                 |
| Asian/Pacific Islander                                 | 440 (2.2)    | 58 (1.2)       |                 |
| Hispanic                                               | 304 (1.5)    | 97 (2.0)       |                 |
| Other                                                  | 328 (1.6)    | 72 (1.5)       |                 |
| <b>Dual eligible at the month of surgery discharge</b> |              |                | 0.12            |
| No                                                     | 18615 (91.6) | 4166 (87.9)    |                 |
| Yes                                                    | 1705 (8.4)   | 571 (12.1)     |                 |
| <b>Cancer diagnosis</b>                                |              |                | 0.23            |
| Breast                                                 | 8106 (39.9)  | 2119 (44.7)    |                 |
| Colorectal                                             | 2711 (13.3)  | 778 (16.4)     |                 |
| Lung                                                   | 2096 (10.3)  | 444 (9.4)      |                 |
| Prostate                                               | 1237 (6.1)   | 347 (7.3)      |                 |

|                                                                                   |              |             |       |
|-----------------------------------------------------------------------------------|--------------|-------------|-------|
| Bladder                                                                           | 792 (3.9)    | 172 (3.6)   |       |
| Female GU                                                                         | 1389 (6.8)   | 255 (5.4)   |       |
| Kidney                                                                            | 993 (4.9)    | 248 (5.2)   |       |
| Metastasis                                                                        | 640 (3.1)    | 88 (1.9)    |       |
| Other                                                                             | 2356 (11.6)  | 286 (6.0)   |       |
| Had any nursing facility service in the 90 days before surgery                    |              |             | 0.01  |
| No                                                                                | 19925 (98.1) | 4640 (98.0) |       |
| Yes                                                                               | 395 (1.9)    | 97 (2.0)    |       |
| Index surgery setting                                                             |              |             | 0.12  |
| IP                                                                                | 12210 (60.1) | 2566 (54.2) |       |
| OP                                                                                | 8110 (39.9)  | 2171 (45.8) |       |
| Diabetes                                                                          |              |             | 0.04  |
| No                                                                                | 12977 (63.9) | 3146 (66.4) |       |
| Without complication                                                              | 3774 (18.6)  | 858 (18.1)  |       |
| With complication                                                                 | 3569 (17.6)  | 733 (15.5)  |       |
| Septicemia, Sepsis, Systemic Inflammatory Response Syndrome/Shock                 |              |             | 0.02  |
| No                                                                                | 19642 (96.7) | 4594 (97.0) |       |
| Yes                                                                               | 678 (3.3)    | 143 (3.0)   |       |
| HIV/AIDS/Opportunistic Infections                                                 |              |             | 0.03  |
| No                                                                                | 20159 (99.2) | 4711 (99.5) |       |
| Yes                                                                               | 161 (0.8)    | 26 (0.5)    |       |
| Protein-Calorie Malnutrition                                                      |              |             | 0.02  |
| No                                                                                | 19964 (98.2) | 4638 (97.9) |       |
| Yes                                                                               | 356 (1.8)    | 99 (2.1)    |       |
| Morbid Obesity                                                                    |              |             | 0.05  |
| No                                                                                | 19211 (94.5) | 4525 (95.5) |       |
| Yes                                                                               | 1109 (5.5)   | 212 (4.5)   |       |
| Other Significant Endocrine and Metabolic Disorders                               |              |             | 0.02  |
| No                                                                                | 18914 (93.1) | 4390 (92.7) |       |
| Yes                                                                               | 1406 (6.9)   | 347 (7.3)   |       |
| End-Stage Liver Disease                                                           |              |             | 0.04  |
| No                                                                                | 19990 (98.4) | 4683 (98.9) |       |
| Yes                                                                               | 330 (1.6)    | 54 (1.1)    |       |
| GI diseases (Chronic Hepatitis, Chronic Pancreatitis, Inflammatory Bowel Disease) |              |             | 0.04  |
| No                                                                                | 19748 (97.2) | 4630 (97.7) |       |
| Yes                                                                               | 572 (2.8)    | 107 (2.3)   |       |
| Intestinal Obstruction/Perforation                                                |              |             | <0.01 |
| No                                                                                | 19483 (95.9) | 4543 (95.9) |       |
| Yes                                                                               | 837 (4.1)    | 194 (4.1)   |       |
| Bone/Joint/Muscle Infections/Necrosis                                             |              |             | 0.01  |
| No                                                                                | 20138 (99.1) | 4689 (99.0) |       |
| Yes                                                                               | 182 (0.9)    | 48 (1.0)    |       |
| Rheumatoid Arthritis and Inflammatory Connective Tissue Disease                   |              |             | 0.04  |
| No                                                                                | 18955 (93.3) | 4373 (92.3) |       |
| Yes                                                                               | 1365 (6.7)   | 364 (7.7)   |       |
| Hematological Disorders                                                           |              |             | 0.07  |
| No                                                                                | 18106 (89.1) | 4314 (91.1) |       |
| Yes                                                                               | 2214 (10.9)  | 423 (8.9)   |       |
| Disorders of Immunity                                                             |              |             | 0.01  |
| No                                                                                | 19527 (96.1) | 4561 (96.3) |       |
| Yes                                                                               | 793 (3.9)    | 176 (3.7)   |       |
| Drug/Alcohol Dependence                                                           |              |             | 0.04  |
| No                                                                                | 19954 (98.2) | 4674 (98.7) |       |

|                                                                                     |              |             |       |
|-------------------------------------------------------------------------------------|--------------|-------------|-------|
| Yes                                                                                 | 366 (1.8)    | 63 (1.3)    |       |
| Major psychiatric disorder                                                          |              |             | 0.02  |
| No                                                                                  | 19278 (94.9) | 4468 (94.3) |       |
| Yes                                                                                 | 1042 (5.1)   | 269 (5.7)   |       |
| Spinal Cord Injury/Paralytic disorders                                              |              |             | 0.02  |
| No                                                                                  | 20065 (98.7) | 4688 (99.0) |       |
| Yes                                                                                 | 255 (1.3)    | 49 (1.0)    |       |
| Neurological disorders affecting motor function                                     |              |             | 0.01  |
| No                                                                                  | 19740 (97.1) | 4608 (97.3) |       |
| Yes                                                                                 | 580 (2.9)    | 129 (2.7)   |       |
| Other Neurologic disorders (Multiple Sclerosis, Seizure, Coma, Brain Anoxic Damage) |              |             | 0.02  |
| No                                                                                  | 19761 (97.2) | 4623 (97.6) |       |
| Yes                                                                                 | 559 (2.8)    | 114 (2.4)   |       |
| Respirator Dependence/Tracheostomy Status                                           |              |             | <0.01 |
| No                                                                                  | 20253 (99.7) | 4722 (99.7) |       |
| Yes                                                                                 | 67 (0.3)     | 15 (0.3)    |       |
| Cardio-respiratory failure                                                          |              |             | 0.05  |
| No                                                                                  | 19697 (96.9) | 4552 (96.1) |       |
| Yes                                                                                 | 623 (3.1)    | 185 (3.9)   |       |
| Congestive Heart Failure                                                            |              |             | <0.01 |
| No                                                                                  | 17458 (85.9) | 4070 (85.9) |       |
| Yes                                                                                 | 2862 (14.1)  | 667 (14.1)  |       |
| Acute Myocardial Infarction/Angina/Other Acute Ischemic Heart Disease               |              |             | 0.04  |
| No                                                                                  | 19010 (93.6) | 4378 (92.4) |       |
| Yes                                                                                 | 1310 (6.4)   | 359 (7.6)   |       |
| Specified Heart Arrhythmias                                                         |              |             | 0.03  |
| No                                                                                  | 16759 (82.5) | 3861 (81.5) |       |
| Yes                                                                                 | 3561 (17.5)  | 876 (18.5)  |       |
| Cerebrovascular insult                                                              |              |             | 0.04  |
| No                                                                                  | 19122 (94.1) | 4505 (95.1) |       |
| Yes                                                                                 | 1198 (5.9)   | 232 (4.9)   |       |
| Severe peripheral vascular disease                                                  |              |             | 0.01  |
| No                                                                                  | 19386 (95.4) | 4531 (95.7) |       |
| Yes                                                                                 | 934 (4.6)    | 206 (4.3)   |       |
| Vascular Disease                                                                    |              |             | <0.01 |
| No                                                                                  | 15723 (77.4) | 3666 (77.4) |       |
| Yes                                                                                 | 4597 (22.6)  | 1071 (22.6) |       |
| Cystic Fibrosis/Fibrosis of Lung and Other Chronic Lung Disorders                   |              |             | 0.01  |
| No                                                                                  | 19782 (97.4) | 4602 (97.2) |       |
| Yes                                                                                 | 538 (2.6)    | 135 (2.8)   |       |
| Chronic Obstructive Pulmonary Disease                                               |              |             | 0.1   |
| No                                                                                  | 16125 (79.4) | 3557 (75.1) |       |
| Yes                                                                                 | 4195 (20.6)  | 1180 (24.9) |       |
| Pneumonia                                                                           |              |             | 0.01  |
| No                                                                                  | 19946 (98.2) | 4645 (98.1) |       |
| Yes                                                                                 | 374 (1.8)    | 92 (1.9)    |       |
| Exudative Macular Degeneration                                                      |              |             | 0.01  |
| No                                                                                  | 19899 (97.9) | 4632 (97.8) |       |
| Yes                                                                                 | 421 (2.1)    | 105 (2.2)   |       |
| Acute Renal Failure                                                                 |              |             | 0.01  |
| No                                                                                  | 19042 (93.7) | 4453 (94.0) |       |
| Yes                                                                                 | 1278 (6.3)   | 284 (6.0)   |       |
| Chronic Kidney Disease                                                              |              |             | <0.01 |

|                                                      |              |             |      |
|------------------------------------------------------|--------------|-------------|------|
| No                                                   | 19834 (97.6) | 4624 (97.6) |      |
| Yes                                                  | 486 (2.4)    | 113 (2.4)   |      |
| Skin Ulcer                                           |              |             | 0.03 |
| No                                                   | 19793 (97.4) | 4592 (96.9) |      |
| Yes                                                  | 527 (2.6)    | 145 (3.1)   |      |
| Head Injury                                          |              |             | 0.01 |
| No                                                   | 20220 (99.5) | 4709 (99.4) |      |
| Yes                                                  | 100 (0.5)    | 28 (0.6)    |      |
| Hip/Vertebral Fractures without Spinal Cord Injury   |              |             | 0.05 |
| No                                                   | 19853 (97.7) | 4589 (96.9) |      |
| Yes                                                  | 467 (2.3)    | 148 (3.1)   |      |
| Limb Amputation                                      |              |             | 0.02 |
| No                                                   | 20173 (99.3) | 4710 (99.4) |      |
| Yes                                                  | 147 (0.7)    | 27 (0.6)    |      |
| Complications of Specified Implanted Device or Graft |              |             | 0.04 |
| No                                                   | 19677 (96.8) | 4621 (97.6) |      |
| Yes                                                  | 643 (3.2)    | 116 (2.4)   |      |
| Artificial Openings for Feeding or Elimination       |              |             | 0.06 |
| No                                                   | 19758 (97.2) | 4647 (98.1) |      |
| Yes                                                  | 562 (2.8)    | 90 (1.9)    |      |

Abs. std. diff. = Absolute standardized difference.

**eTable 3. Characteristics of patients receiving a major cancer surgery**

| Patient characteristic                                                | Maryland    | Control states | Abs. std. diff. |
|-----------------------------------------------------------------------|-------------|----------------|-----------------|
|                                                                       | n= 6858     | n= 1686        |                 |
|                                                                       | n (%)       |                |                 |
| <b>Surgery year</b>                                                   |             |                |                 |
| 2011                                                                  | 938 (13.7)  | 245 (14.5)     |                 |
| 2012                                                                  | 799 (11.7)  | 215 (12.8)     |                 |
| 2013                                                                  | 913 (13.3)  | 250 (14.8)     |                 |
| 2014                                                                  | 963 (14.0)  | 225 (13.3)     |                 |
| 2015                                                                  | 890 (13.0)  | 221 (13.1)     |                 |
| 2016                                                                  | 855 (12.5)  | 187 (11.1)     |                 |
| 2017                                                                  | 838 (12.2)  | 192 (11.4)     |                 |
| 2018, Jan-Nov                                                         | 662 (9.7)   | 151 (9.0)      |                 |
| <b>Age at surgery</b>                                                 |             |                | 0.06            |
| 66-69                                                                 | 1440 (21.0) | 374 (22.2)     |                 |
| 70-74                                                                 | 1991 (29.0) | 487 (28.9)     |                 |
| 75-79                                                                 | 1629 (23.8) | 378 (22.4)     |                 |
| 80-84                                                                 | 1159 (16.9) | 284 (16.8)     |                 |
| 85+                                                                   | 639 (9.3)   | 163 (9.7)      |                 |
| <b>Sex</b>                                                            |             |                | 0.07            |
| Male                                                                  | 3310 (48.3) | 869 (51.5)     |                 |
| Female                                                                | 3548 (51.7) | 817 (48.5)     |                 |
| <b>Race</b>                                                           |             |                | 0.48            |
| NH white                                                              | 5249 (76.5) | 1541 (91.4)    |                 |
| NH Black                                                              | 1247 (18.2) | 69 (4.1)       |                 |
| Asian/Pacific Islander                                                | 166 (2.4)   | 30 (1.8)       |                 |
| Hispanic                                                              | 100 (1.5)   | 35 (2.1)       |                 |
| Other                                                                 | 96 (1.4)    | 11 (0.7)       |                 |
| <b>Dual eligible at the month of surgery discharge</b>                |             |                | 0.14            |
| No                                                                    | 6303 (91.9) | 1479 (87.7)    |                 |
| Yes                                                                   | 555 (8.1)   | 207 (12.3)     |                 |
| <b>Cancer diagnosis</b>                                               |             |                | 0.28            |
| Breast                                                                | -           | -              |                 |
| Colorectal                                                            | 2334 (34.0) | 737 (43.7)     |                 |
| Lung                                                                  | 1726 (25.2) | 405 (24.0)     |                 |
| Prostate                                                              | -           | -              |                 |
| Bladder                                                               | 520 (7.6)   | 116 (6.9)      |                 |
| Female GU                                                             | 149 (2.2)   | 13 (0.8)       |                 |
| Kidney                                                                | 801 (11.7)  | 226 (13.4)     |                 |
| Metastasis                                                            | 261 (3.8)   | 37 (2.2)       |                 |
| Other                                                                 | 1067 (15.6) | 152 (9.0)      |                 |
| <b>Surgery type</b>                                                   |             |                | 0.33            |
| Colectomy                                                             | 2640 (38.5) | 790 (46.9)     |                 |
| Cystectomy                                                            | 316 (4.6)   | 60 (3.6)       |                 |
| Esophagectomy/Gastrectomy                                             | 302 (4.4)   | 46 (2.7)       |                 |
| Lung resection                                                        | 1899 (27.7) | 441 (26.2)     |                 |
| Nephrectomy                                                           | 1024 (14.9) | 280 (16.6)     |                 |
| Pancreatectomy                                                        | 438 (6.4)   | 41 (2.4)       |                 |
| Multiple surgeries                                                    | 239 (3.5)   | 28 (1.7)       |                 |
| <b>Had any nursing facility service in the 90 days before surgery</b> |             |                | 0.02            |
| No                                                                    | 6711 (97.9) | 1645 (97.6)    |                 |
| Yes                                                                   | 147 (2.1)   | 41 (2.4)       |                 |
| <b>Diabetes</b>                                                       |             |                | 0.04            |

|                                                                                     |             |             |       |
|-------------------------------------------------------------------------------------|-------------|-------------|-------|
| No                                                                                  | 4266 (62.2) | 1072 (63.6) |       |
| Without complication                                                                | 1352 (19.7) | 316 (18.7)  |       |
| With complication                                                                   | 1240 (18.1) | 298 (17.7)  |       |
| Septicemia, Sepsis, Systemic Inflammatory Response Syndrome/Shock                   |             |             | <0.01 |
| No                                                                                  | 6567 (95.8) | 1615 (95.8) |       |
| Yes                                                                                 | 291 (4.2)   | 71 (4.2)    |       |
| HIV/AIDS/Opportunistic Infections                                                   |             |             | 0.01  |
| No                                                                                  | 6786 (99.0) | 1667 (98.9) |       |
| Yes                                                                                 | 72 (1.0)    | 19 (1.1)    |       |
| Protein-Calorie Malnutrition                                                        |             |             | 0.04  |
| No                                                                                  | 6683 (97.4) | 1631 (96.7) |       |
| Yes                                                                                 | 175 (2.6)   | 55 (3.3)    |       |
| Morbid Obesity                                                                      |             |             | 0.04  |
| No                                                                                  | 6514 (95.0) | 1615 (95.8) |       |
| Yes                                                                                 | 344 (5.0)   | 71 (4.2)    |       |
| Other Significant Endocrine and Metabolic Disorders                                 |             |             | 0.07  |
| No                                                                                  | 6300 (91.9) | 1516 (89.9) |       |
| Yes                                                                                 | 558 (8.1)   | 170 (10.1)  |       |
| End-Stage Liver Disease                                                             |             |             | <0.01 |
| No                                                                                  | 6734 (98.2) | 1656 (98.2) |       |
| Yes                                                                                 | 124 (1.8)   | 30 (1.8)    |       |
| GI diseases (Chronic Hepatitis, Chronic Pancreatitis, Inflammatory Bowel Disease)   |             |             | 0.09  |
| No                                                                                  | 6584 (96.0) | 1644 (97.5) |       |
| Yes                                                                                 | 274 (4.0)   | 42 (2.5)    |       |
| Intestinal Obstruction/Perforation                                                  |             |             | 0.01  |
| No                                                                                  | 6385 (93.1) | 1567 (92.9) |       |
| Yes                                                                                 | 473 (6.9)   | 119 (7.1)   |       |
| Bone/Joint/Muscle Infections/Necrosis                                               |             |             | 0.01  |
| No                                                                                  | 6783 (98.9) | 1669 (99.0) |       |
| Yes                                                                                 | 75 (1.1)    | 17 (1.0)    |       |
| Rheumatoid Arthritis and Inflammatory Connective Tissue Disease                     |             |             | 0.06  |
| No                                                                                  | 6419 (93.6) | 1553 (92.1) |       |
| Yes                                                                                 | 439 (6.4)   | 133 (7.9)   |       |
| Hematological Disorders                                                             |             |             | 0.05  |
| No                                                                                  | 5949 (86.7) | 1489 (88.3) |       |
| Yes                                                                                 | 909 (13.3)  | 197 (11.7)  |       |
| Disorders of Immunity                                                               |             |             | 0.02  |
| No                                                                                  | 6560 (95.7) | 1620 (96.1) |       |
| Yes                                                                                 | 298 (4.3)   | 66 (3.9)    |       |
| Drug/Alcohol Dependence                                                             |             |             | 0.04  |
| No                                                                                  | 6702 (97.7) | 1657 (98.3) |       |
| Yes                                                                                 | 156 (2.3)   | 29 (1.7)    |       |
| Major psychiatric disorder                                                          |             |             | 0.01  |
| No                                                                                  | 6517 (95.0) | 1604 (95.1) |       |
| Yes                                                                                 | 341 (5.0)   | 82 (4.9)    |       |
| Spinal Cord Injury/Paralytic disorders                                              |             |             | <0.01 |
| No                                                                                  | 6759 (98.6) | 1662 (98.6) |       |
| Yes                                                                                 | 99 (1.4)    | 24 (1.4)    |       |
| Neurological disorders affecting motor function                                     |             |             | 0.02  |
| No                                                                                  | 6651 (97.0) | 1641 (97.3) |       |
| Yes                                                                                 | 207 (3.0)   | 45 (2.7)    |       |
| Other Neurologic disorders (Multiple Sclerosis, Seizure, Coma, Brain Anoxic Damage) |             |             | 0.04  |
| No                                                                                  | 6652 (97.0) | 1646 (97.6) |       |



|                                                                       |             |             |      |
|-----------------------------------------------------------------------|-------------|-------------|------|
| Yes                                                                   | 206 (3.0)   | 40 (2.4)    |      |
| Cardio-respiratory failure                                            |             |             | 0.06 |
| No                                                                    | 6560 (95.7) | 1592 (94.4) |      |
| Yes                                                                   | 298 (4.3)   | 94 (5.6)    |      |
| Congestive Heart Failure                                              |             |             | 0.01 |
| No                                                                    | 5645 (82.3) | 1391 (82.5) |      |
| Yes                                                                   | 1213 (17.7) | 295 (17.5)  |      |
| Acute Myocardial Infarction/Angina/Other Acute Ischemic Heart Disease |             |             | 0.09 |
| No                                                                    | 6297 (91.8) | 1504 (89.2) |      |
| Yes                                                                   | 561 (8.2)   | 182 (10.8)  |      |
| Specified Heart Arrhythmias                                           |             |             | 0.04 |
| No                                                                    | 5456 (79.6) | 1315 (78.0) |      |
| Yes                                                                   | 1402 (20.4) | 371 (22.0)  |      |
| Cerebrovascular insult                                                |             |             | 0.05 |
| No                                                                    | 6357 (92.7) | 1585 (94.0) |      |
| Yes                                                                   | 501 (7.3)   | 101 (6.0)   |      |
| Severe peripheral vascular disease                                    |             |             | 0.01 |
| No                                                                    | 6474 (94.4) | 1587 (94.1) |      |
| Yes                                                                   | 384 (5.6)   | 99 (5.9)    |      |
| Vascular Disease                                                      |             |             | 0.03 |
| No                                                                    | 5036 (73.4) | 1212 (71.9) |      |
| Yes                                                                   | 1822 (26.6) | 474 (28.1)  |      |
| Cystic Fibrosis/Fibrosis of Lung and Other Chronic Lung Disorders     |             |             | 0.01 |
| No                                                                    | 6606 (96.3) | 1622 (96.2) |      |
| Yes                                                                   | 252 (3.7)   | 64 (3.8)    |      |
| Chronic Obstructive Pulmonary Disease                                 |             |             | 0.16 |
| No                                                                    | 4835 (70.5) | 1061 (62.9) |      |
| Yes                                                                   | 2023 (29.5) | 625 (37.1)  |      |
| Pneumonia                                                             |             |             | 0.02 |
| No                                                                    | 6683 (97.4) | 1638 (97.2) |      |
| Yes                                                                   | 175 (2.6)   | 48 (2.8)    |      |
| Exudative Macular Degeneration                                        |             |             | 0.02 |
| No                                                                    | 6691 (97.6) | 1651 (97.9) |      |
| Yes                                                                   | 167 (2.4)   | 35 (2.1)    |      |
| Acute Renal Failure                                                   |             |             | 0.01 |
| No                                                                    | 6296 (91.8) | 1544 (91.6) |      |
| Yes                                                                   | 562 (8.2)   | 142 (8.4)   |      |
| Chronic Kidney Disease                                                |             |             | 0.02 |
| No                                                                    | 6672 (97.3) | 1635 (97.0) |      |
| Yes                                                                   | 186 (2.7)   | 51 (3.0)    |      |
| Skin Ulcer                                                            |             |             | 0.02 |
| No                                                                    | 6677 (97.4) | 1635 (97.0) |      |
| Yes                                                                   | 181 (2.6)   | 51 (3.0)    |      |
| Head Injury                                                           |             |             | 0.05 |
| No                                                                    | 6831 (99.6) | 1673 (99.2) |      |
| Yes                                                                   | 27 (0.4)    | 13 (0.8)    |      |
| Hip/Vertebral Fractures without Spinal Cord Injury                    |             |             | 0.05 |
| No                                                                    | 6696 (97.6) | 1632 (96.8) |      |
| Yes                                                                   | 162 (2.4)   | 54 (3.2)    |      |
| Limb Amputation                                                       |             |             | 0.01 |
| No                                                                    | 6792 (99.0) | 1672 (99.2) |      |
| Yes                                                                   | 66 (1.0)    | 14 (0.8)    |      |
| Complications of Specified Implanted Device or Graft                  |             |             | 0.04 |

|                                                |             |             |     |
|------------------------------------------------|-------------|-------------|-----|
| No                                             | 6613 (96.4) | 1637 (97.1) |     |
| Yes                                            | 245 (3.6)   | 49 (2.9)    |     |
| Artificial Openings for Feeding or Elimination |             |             | 0.1 |
| No                                             | 6570 (95.8) | 1644 (97.5) |     |
| Yes                                            | 288 (4.2)   | 42 (2.5)    |     |

Abs. std. diff. = Absolute standardized difference.

### C. Model specification for estimating difference-in-differences

For each outcome measure, we used a linear regression model to estimate the difference-in-differences (D-i-D). (ref 4) For binary outcome measures, this is also known as the linear probability model. The estimating equation has the form:

$$E(y_{iht}) = \beta_0 + \beta_1 Hospital_h + \beta_2 Year_t + \beta_3 Patient\_factors_{iht} + \delta_0 \mathbf{1}[h \in MD, t = 2014] + \delta_{post} \mathbf{1}[h \in MD, t > 2014] + \varepsilon_{iht}$$

where  $y_{iht}$  is the outcome measure for patient  $i$  in hospital  $h$  and year  $t$ ,  $Hospital_h$  is a vector of hospital fixed effects,  $Year_t$  is a vector of year fixed effects,  $Patient\_factors_{iht}$  is a vector of patient characteristics that were unbalanced between Maryland and the control group,  $\mathbf{1}[h \in MD, t = 2014]$  is a dummy variable that is equal to 1 if the hospital is in Maryland and the year is 2014. This term is to remove the year of 2014 from the D-i-D estimation.  $\mathbf{1}[h \in MD, t > 2014]$  is a dummy variable that is equal to 1 if the hospital is in Maryland and the year is after 2014. The parameter  $\delta_{post}$  estimates the D-i-D in the outcome measure for Maryland hospitals from the pre-GBR period to the post period.

## D. Counterfactual assumption

Before estimating the difference-in-difference (D-i-D) in the outcome measure, we used the following equation to examine if Maryland hospitals and their matched control hospitals had similar trends before 2014. The  $\delta_k$  parameters estimate the difference between Maryland and control hospitals in the whole study period. Parameters  $\delta_{-3}$ ,  $\delta_{-2}$ , and  $\delta_{-1}$  are for the pre-GBR period and  $\delta_1 - \delta_4$  are for the post-period. If the parameter estimates for the pre-period are close to zero, it means these two groups of hospitals have similar trends before 2014.

$$E(y_{iht}) = \beta_0 + \beta_1 Hospital_h + \beta_2 Year_t + \beta_3 Patient\_factors_{iht} + \sum_{k=-3}^4 \delta_k \mathbf{1}[h \in MD, t = 2014 + k] + \varepsilon_{iht}$$

For each cohort and outcome, these  $\delta_k$  estimates were plotted by year (eFigures 1 and 2).

**Part I. Main cohort (all inpatient and outpatient cancer surgical episodes from Maryland and matched control hospitals)**

a. Total Medicare payment during episode

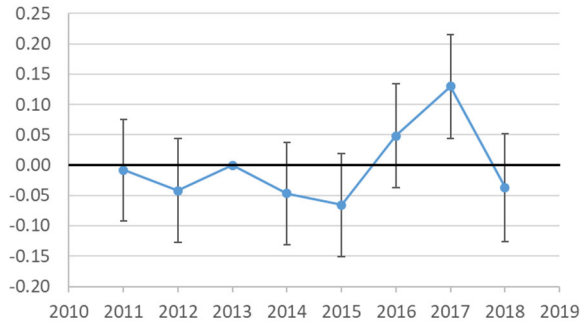

Likelihood ratio test for th pre-trend,  $p=0.60$

b. Any ED visit in 30 days

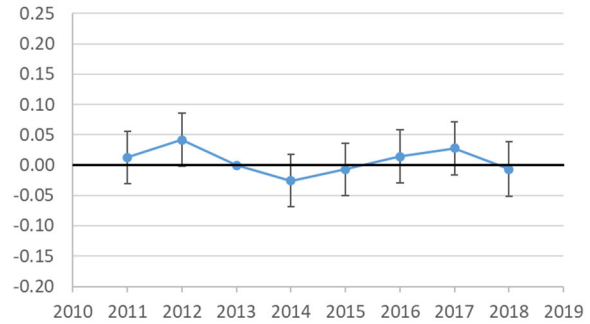

Likelihood ratio test for th pre-trend,  $p=0.16$

c. Any readmission in 30 days

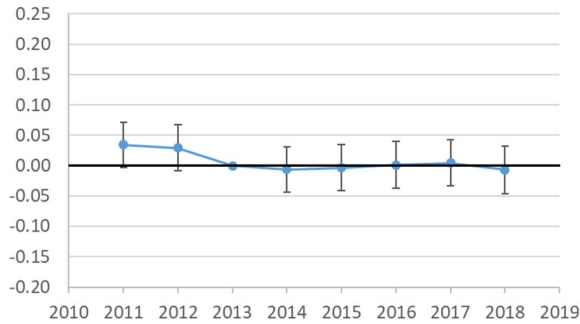

Likelihood ratio test for th pre-trend,  $p=0.15$

d. Mortality in 30 days

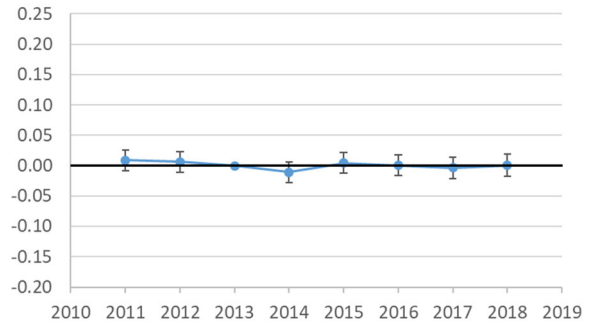

Likelihood ratio test for th pre-trend,  $p=0.57$

eFigure 1. Annual D-i-D estimates. The coefficient estimates in the figures measure how much the trend for Maryland hospitals depart from the trend for control hospitals before and after GBR implementation. If the estimates before 2014 are not significantly different from zero, it means Maryland hospitals and control hospitals share similar trends before GBR. The year of 2013 is the reference of comparison. The null hypothesis of the likelihood ratio test was that coefficients in the pre-period were all equal to zero.

**Conclusion:**

None of the estimates in the pre-period were significantly different from zero. That is, no significant violation of the counterfactual assumption was observed.

## Part II. Inpatient major cancer surgery sub-cohort

a. Total Medicare payment during episode

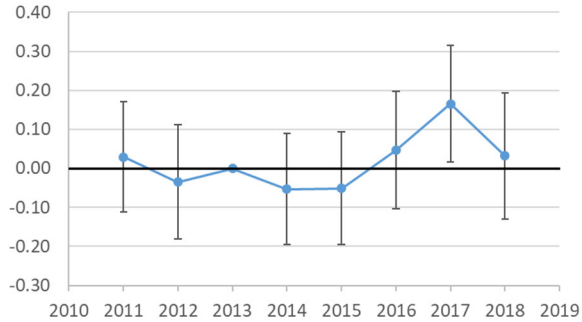

Likelihood ratio test for th pre-trend,  $p=0.70$

b. Any ED visit in 30 days

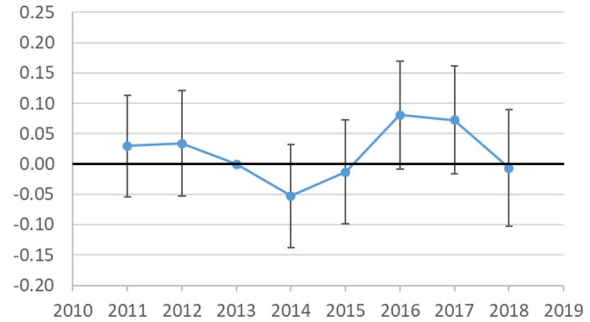

Likelihood ratio test for th pre-trend,  $p=0.69$

c. Any readmission in 30 days

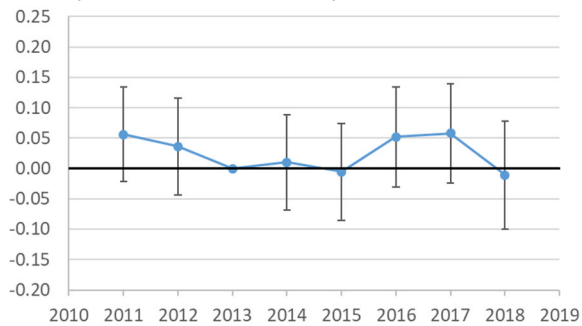

Likelihood ratio test for th pre-trend,  $p=0.36$

d. Mortality in 30 days

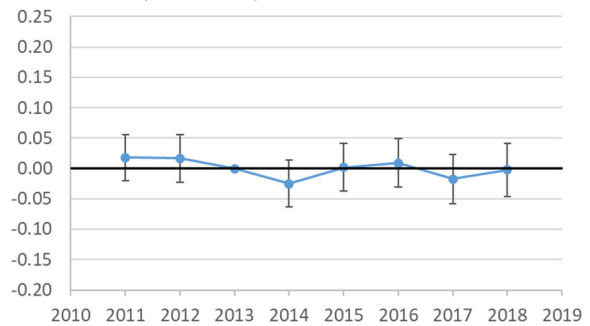

Likelihood ratio test for th pre-trend,  $p=0.59$

e. Discharged to SNF/IRF

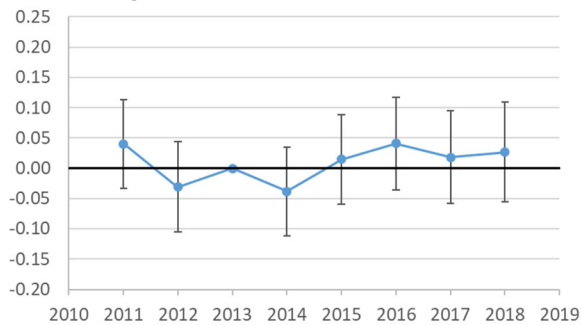

Likelihood ratio test for th pre-trend,  $p=0.17$

eFigure 2. Annual D-i-D estimates. The coefficient estimates in the figures measure how much the trend for Maryland hospitals depart from the trend for control hospitals before and after GBR implementation. If the estimates before 2014 are not significantly different from zero, it means Maryland hospitals and control hospitals share similar trends before GBR. The year of 2013 is the reference of comparison. The null hypothesis of the likelihood ratio test was that coefficients in the pre-period were all equal to zero.

### Conclusion:

None of the estimates in the pre-period were significantly different from zero. That is, no significant violation of the counterfactual assumption was observed.

## E. Surgery codes for identifying cancer surgeries

**eTable 4. Surgery codes for identifying cancer surgeries**

| Cancer Type | Code Type  | Code    | Description                                                  | Major Surgery Type |
|-------------|------------|---------|--------------------------------------------------------------|--------------------|
| Anal        | ICD-9-CM   | 45.95   | Anal anastomosis                                             |                    |
| Anal        | ICD-9-CM   | 48.42   | Lap pull-thru res rectum                                     |                    |
| Anal        | ICD-9-CM   | 48.49   | Pull-thru rect resec NEC                                     |                    |
| Anal        | ICD-9-CM   | 48.50   | Abdominoperineal resection of the rectum, not otherwise      | Colectomy          |
| Anal        | ICD-9-CM   | 48.51   | Laparoscopic abdominoperineal resection of the rectum        | Colectomy          |
| Anal        | ICD-9-CM   | 48.52   | Open abdominoperineal resection of the rectum                | Colectomy          |
| Anal        | ICD-9-CM   | 48.59   | Other abdominoperineal resection of the rectum               | Colectomy          |
| Anal        | ICD-9-CM   | 48.62   | Anterior resection of rectum with synchronous colostomy      | Colectomy          |
| Anal        | ICD-9-CM   | 48.63   | Other anterior resection of rectum                           | Colectomy          |
| Anal        | ICD-9-CM   | 48.69   | Other partial resection of rectum                            | Colectomy          |
| Anal        | ICD-9-CM   | 49.6    | Excision of anus                                             |                    |
| Anal        | ICD-9-CM   | 57.71   | Pelvic exenteration                                          | Cystectomy         |
| Anal        | ICD-9-CM   | 68.8    | Pelvic evisceration                                          |                    |
| Anal        | ICD-10-PCS | 0D1B0ZQ | Bypass Ileum to Anus, Open Approach                          |                    |
| Anal        | ICD-10-PCS | 0D1B4ZQ | Bypass Ileum to Anus, Percutaneous Endoscopic Approach       |                    |
| Anal        | ICD-10-PCS | 0D1B8ZQ | Bypass Ileum to Anus, Endo                                   |                    |
| Anal        | ICD-10-PCS | 0DBP0ZZ | Excision of Rectum, Open Approach                            |                    |
| Anal        | ICD-10-PCS | 0DBP4ZZ | Excision of Rectum, Percutaneous Endoscopic Approach         |                    |
| Anal        | ICD-10-PCS | 0DBQ0ZZ | Excision of Anus, Open Approach                              |                    |
| Anal        | ICD-10-PCS | 0DBQ3ZZ | Excision of Anus, Percutaneous Approach                      |                    |
| Anal        | ICD-10-PCS | 0DBQ4ZZ | Excision of Anus, Percutaneous Endoscopic Approach           |                    |
| Anal        | ICD-10-PCS | 0DBQ7ZZ | Excision of Anus, Via Natural or Artificial Opening          |                    |
| Anal        | ICD-10-PCS | 0DBQ8ZZ | Excision of Anus, Endo                                       |                    |
| Anal        | ICD-10-PCS | 0DBQXZZ | Excision of Anus, External Approach                          |                    |
| Anal        | ICD-10-PCS | 0DBR0ZZ | Excision of Anal Sphincter, Open Approach                    |                    |
| Anal        | ICD-10-PCS | 0DBR3ZZ | Excision of Anal Sphincter, Percutaneous Approach            |                    |
| Anal        | ICD-10-PCS | 0DBR4ZZ | Excision of Anal Sphincter, Percutaneous Endoscopic Approach |                    |
| Anal        | ICD-10-PCS | 0DTP0ZZ | Resection of Rectum, Open Approach                           | Colectomy          |
| Anal        | ICD-10-PCS | 0DTP4ZZ | Resection of Rectum, Percutaneous Endoscopic Approach        | Colectomy          |
| Anal        | ICD-10-PCS | 0DTP7ZZ | Resection of Rectum, Via Natural or Artificial Opening       | Colectomy          |
| Anal        | ICD-10-PCS | 0DTP8ZZ | Resection of Rectum, Endo                                    | Colectomy          |

|         |            |         |                                                             |            |
|---------|------------|---------|-------------------------------------------------------------|------------|
| Anal    | ICD-10-PCS | 0DTQ0ZZ | Resection of Anus, Open Approach                            |            |
| Anal    | ICD-10-PCS | 0DTQ4ZZ | Resection of Anus, Percutaneous Endoscopic Approach         |            |
| Anal    | ICD-10-PCS | 0DTQ7ZZ | Resection of Anus, Via Natural or Artificial Opening        |            |
| Anal    | ICD-10-PCS | 0DTQ8ZZ | Resection of Anus, Endo                                     |            |
| Anal    | ICD-10-PCS | 0DTR0ZZ | Resection of Anal Sphincter, Open Approach                  |            |
| Anal    | ICD-10-PCS | 0DTR4ZZ | Resection of Anal Sphincter, Perc Endo Approach             |            |
| Anal    | ICD-10-PCS | 0TTB0ZZ | Resection of Bladder, Open Approach                         | Cystectomy |
| Anal    | ICD-10-PCS | 0TTB4ZZ | Resection of Bladder, Percutaneous Endoscopic Approach      | Cystectomy |
| Anal    | ICD-10-PCS | 0TTB7ZZ | Resection of Bladder, Via Natural or Artificial Opening     | Cystectomy |
| Anal    | ICD-10-PCS | 0TTB8ZZ | Resection of Bladder, Endo                                  | Cystectomy |
| Anal    | ICD-10-PCS | 0TTD0ZZ | Resection of Urethra, Open Approach                         |            |
| Anal    | ICD-10-PCS | 0TTD4ZZ | Resection of Urethra, Percutaneous Endoscopic Approach      |            |
| Anal    | ICD-10-PCS | 0TTD7ZZ | Resection of Urethra, Via Natural or Artificial Opening     |            |
| Anal    | ICD-10-PCS | 0TTD8ZZ | Resection of Urethra, Endo                                  |            |
| Anal    | ICD-10-PCS | 0UT20ZZ | Resection of Bilateral Ovaries, Open Approach               |            |
| Anal    | ICD-10-PCS | 0UT70ZZ | Resection of Bilateral Fallopian Tubes, Open Approach       |            |
| Anal    | ICD-10-PCS | 0UT90ZZ | Resection of Uterus, Open Approach                          |            |
| Anal    | ICD-10-PCS | 0UTC0ZZ | Resection of Cervix, Open Approach                          |            |
| Anal    | ICD-10-PCS | 0UTG0ZZ | Resection of Vagina, Open Approach                          |            |
| Anal    | ICD-10-PCS | 0VT00ZZ | Resection of Prostate, Open Approach                        |            |
| Anal    | ICD-10-PCS | 0VT04ZZ | Resection of Prostate, Percutaneous Endoscopic Approach     |            |
| Anal    | ICD-10-PCS | 0VT07ZZ | Resection of Prostate, Via Natural or Artificial Opening    |            |
| Anal    | ICD-10-PCS | 0VT08ZZ | Resection of Prostate, Endo                                 |            |
| Anal    | ICD-10-PCS | 0VT30ZZ | Resection of Bilateral Seminal Vesicles, Open Approach      |            |
| Anal    | ICD-10-PCS | 0VT34ZZ | Resection of Bilateral Seminal Vesicles, Perc Endo Approach |            |
| Bladder | ICD-9-CM   | 57.71   | Pelvic exenteration                                         | Cystectomy |
| Bladder | ICD-9-CM   | 57.79   | Total cystectomy NEC                                        | Cystectomy |
| Bladder | ICD-9-CM   | 57.87   | Bladder reconstruction                                      |            |
| Bladder | ICD-9-CM   | 68.8    | Pelvic evisceration                                         |            |
| Bladder | ICD-10-PCS | 0TRB07Z | Replacement of Bladder with Autol Sub, Open Approach        |            |
| Bladder | ICD-10-PCS | 0TRB0JZ | Replacement of Bladder with Synth Sub, Open Approach        |            |
| Bladder | ICD-10-PCS | 0TRB0KZ | Replacement of Bladder with Nonaut Sub, Open Approach       |            |



|         |            |         |                                                              |            |
|---------|------------|---------|--------------------------------------------------------------|------------|
| Bladder | ICD-10-PCS | 0TRB47Z | Replacement of Bladder with Autol Sub, Perc Endo Approach    |            |
| Bladder | ICD-10-PCS | 0TRB4JZ | Replacement of Bladder with Synth Sub, Perc Endo Approach    |            |
| Bladder | ICD-10-PCS | 0TRB4KZ | Replacement of Bladder with Nonaut Sub, Perc Endo Approach   |            |
| Bladder | ICD-10-PCS | 0TRB77Z | Replacement of Bladder with Autol Sub, Via Opening           |            |
| Bladder | ICD-10-PCS | 0TRB7JZ | Replacement of Bladder with Synth Sub, Via Opening           |            |
| Bladder | ICD-10-PCS | 0TRB7KZ | Replacement of Bladder with Nonaut Sub, Via Opening          |            |
| Bladder | ICD-10-PCS | 0TRB87Z | Replacement of Bladder with Autol Sub, Endo                  |            |
| Bladder | ICD-10-PCS | 0TRB8JZ | Replacement of Bladder with Synthetic Substitute, Endo       |            |
| Bladder | ICD-10-PCS | 0TRB8KZ | Replacement of Bladder with Nonaut Sub, Endo                 |            |
| Bladder | ICD-10-PCS | 0TTB0ZZ | Resection of Bladder, Open Approach                          | Cystectomy |
| Bladder | ICD-10-PCS | 0TTB4ZZ | Resection of Bladder, Percutaneous Endoscopic Approach       | Cystectomy |
| Bladder | ICD-10-PCS | 0TTB7ZZ | Resection of Bladder, Via Natural or Artificial Opening      | Cystectomy |
| Bladder | ICD-10-PCS | 0TTB8ZZ | Resection of Bladder, Endo                                   | Cystectomy |
| Bladder | ICD-10-PCS | 0TTC0ZZ | Resection of Bladder Neck, Open Approach                     | Cystectomy |
| Bladder | ICD-10-PCS | 0TTC4ZZ | Resection of Bladder Neck, Percutaneous Endoscopic Approach  | Cystectomy |
| Bladder | ICD-10-PCS | 0TTC7ZZ | Resection of Bladder Neck, Via Natural or Artificial Opening | Cystectomy |
| Bladder | ICD-10-PCS | 0TTC8ZZ | Resection of Bladder Neck, Via Natural or Artificial Opening | Cystectomy |
| Bladder | ICD-10-PCS | 0TTD0ZZ | Resection of Urethra, Open Approach                          |            |
| Bladder | ICD-10-PCS | 0TTD4ZZ | Resection of Urethra, Percutaneous Endoscopic Approach       |            |
| Bladder | ICD-10-PCS | 0TTD7ZZ | Resection of Urethra, Via Natural or Artificial Opening      |            |
| Bladder | ICD-10-PCS | 0TTD8ZZ | Resection of Urethra, Endo                                   |            |
| Bladder | ICD-10-PCS | 0TUB07Z | Supplement Bladder with Autol Sub, Open Approach             |            |
| Bladder | ICD-10-PCS | 0TUB0JZ | Supplement Bladder with Synthetic Substitute, Open Approach  |            |
| Bladder | ICD-10-PCS | 0TUB0KZ | Supplement Bladder with Nonaut Sub, Open Approach            |            |
| Bladder | ICD-10-PCS | 0TUB47Z | Supplement Bladder with Autol Sub, Perc Endo Approach        |            |
| Bladder | ICD-10-PCS | 0TUB4JZ | Supplement Bladder with Synth Sub, Perc Endo Approach        |            |
| Bladder | ICD-10-PCS | 0TUB4KZ | Supplement Bladder with Nonaut Sub, Perc Endo Approach       |            |
| Bladder | ICD-10-PCS | 0TUB77Z | Supplement Bladder with Autol Sub, Via Opening               |            |
| Bladder | ICD-10-PCS | 0TUB7JZ | Supplement Bladder with Synthetic Substitute, Via Opening    |            |

|         |            |         |                                                             |  |
|---------|------------|---------|-------------------------------------------------------------|--|
| Bladder | ICD-10-PCS | 0TUB7KZ | Supplement Bladder with Nonaut Sub, Via Opening             |  |
| Bladder | ICD-10-PCS | 0TUB87Z | Supplement Bladder with Autologous Tissue Substitute, Endo  |  |
| Bladder | ICD-10-PCS | 0TUB8JZ | Supplement Bladder with Synthetic Substitute, Endo          |  |
| Bladder | ICD-10-PCS | 0TUB8KZ | Supplement Bladder with Nonaut Sub, Endo                    |  |
| Bladder | ICD-10-PCS | 0UT20ZZ | Resection of Bilateral Ovaries, Open Approach               |  |
| Bladder | ICD-10-PCS | 0UT70ZZ | Resection of Bilateral Fallopian Tubes, Open Approach       |  |
| Bladder | ICD-10-PCS | 0UT90ZZ | Resection of Uterus, Open Approach                          |  |
| Bladder | ICD-10-PCS | 0UTC0ZZ | Resection of Cervix, Open Approach                          |  |
| Bladder | ICD-10-PCS | 0UTG0ZZ | Resection of Vagina, Open Approach                          |  |
| Bladder | ICD-10-PCS | 0VT00ZZ | Resection of Prostate, Open Approach                        |  |
| Bladder | ICD-10-PCS | 0VT04ZZ | Resection of Prostate, Percutaneous Endoscopic Approach     |  |
| Bladder | ICD-10-PCS | 0VT07ZZ | Resection of Prostate, Via Natural or Artificial Opening    |  |
| Bladder | ICD-10-PCS | 0VT08ZZ | Resection of Prostate, Endo                                 |  |
| Bladder | ICD-10-PCS | 0VT30ZZ | Resection of Bilateral Seminal Vesicles, Open Approach      |  |
| Bladder | ICD-10-PCS | 0VT34ZZ | Resection of Bilateral Seminal Vesicles, Perc Endo Approach |  |
| Breast  | ICD-9-CM   | 85.20   | Local excision of lesion of breast                          |  |
| Breast  | ICD-9-CM   | 85.21   | Local excision of lesion of breast                          |  |
| Breast  | ICD-9-CM   | 85.22   | Resection of quadrant of breast                             |  |
| Breast  | ICD-9-CM   | 85.23   | Subtotal mastectomy                                         |  |
| Breast  | ICD-9-CM   | 85.41   | Unilateral simple mastectomy                                |  |
| Breast  | ICD-9-CM   | 85.42   | Bilateral simple mastectomy                                 |  |
| Breast  | ICD-9-CM   | 85.43   | Unilateral extended simple mastectomy                       |  |
| Breast  | ICD-9-CM   | 85.44   | Bilateral extended simple mastectomy                        |  |
| Breast  | ICD-9-CM   | 85.45   | Unilateral radical mastectomy                               |  |
| Breast  | ICD-9-CM   | 85.46   | Bilateral radical mastectomy                                |  |
| Breast  | ICD-9-CM   | 85.47   | Unilateral extended radical mastectomy                      |  |
| Breast  | ICD-9-CM   | 85.48   | Bilateral extended radical mastectomy                       |  |
| Breast  | ICD-10-PCS | 0H0T0JZ | Alteration of Right Breast with Synth Sub, Open Approach    |  |
| Breast  | ICD-10-PCS | 0H0T0KZ | Alteration of Right Breast with Nonaut Sub, Open Approach   |  |
| Breast  | ICD-10-PCS | 0H0T3JZ | Alteration of Right Breast with Synth Sub, Perc Approach    |  |
| Breast  | ICD-10-PCS | 0H0T3KZ | Alteration of Right Breast with Nonaut Sub, Perc Approach   |  |
| Breast  | ICD-10-PCS | 0H0U0JZ | Alteration of Left Breast with Synth Sub, Open Approach     |  |
| Breast  | ICD-10-PCS | 0H0U0KZ | Alteration of Left Breast with Nonaut Sub, Open Approach    |  |

|        |            |         |                                                              |  |
|--------|------------|---------|--------------------------------------------------------------|--|
| Breast | ICD-10-PCS | 0H0U3JZ | Alteration of Left Breast with Synth Sub, Perc Approach      |  |
| Breast | ICD-10-PCS | 0H0U3KZ | Alteration of Left Breast with Nonaut Sub, Perc Approach     |  |
| Breast | ICD-10-PCS | 0H0V07Z | Alteration of Bilateral Breast with Autol Sub, Open Approach |  |
| Breast | ICD-10-PCS | 0H0V0JZ | Alteration of Bilateral Breast with Synth Sub, Open Approach |  |
| Breast | ICD-10-PCS | 0H0V0KZ | Alteration of Bi Breast with Nonaut Sub, Open Approach       |  |
| Breast | ICD-10-PCS | 0H0V37Z | Alteration of Bilateral Breast with Autol Sub, Perc Approach |  |
| Breast | ICD-10-PCS | 0H0V3JZ | Alteration of Bilateral Breast with Synth Sub, Perc Approach |  |
| Breast | ICD-10-PCS | 0H0V3KZ | Alteration of Bi Breast with Nonaut Sub, Perc Approach       |  |
| Breast | ICD-10-PCS | 0H5T0ZZ | Destruction of Right Breast, Open Approach                   |  |
| Breast | ICD-10-PCS | 0H5T3ZZ | Destruction of Right Breast, Percutaneous Approach           |  |
| Breast | ICD-10-PCS | 0H5T7ZZ | Destruction of Right Breast, Via Opening                     |  |
| Breast | ICD-10-PCS | 0H5T8ZZ | Destruction of Right Breast, Endo                            |  |
| Breast | ICD-10-PCS | 0H5TXZZ | Destruction of Right Breast, External Approach               |  |
| Breast | ICD-10-PCS | 0H5U0ZZ | Destruction of Left Breast, Open Approach                    |  |
| Breast | ICD-10-PCS | 0H5U3ZZ | Destruction of Left Breast, Percutaneous Approach            |  |
| Breast | ICD-10-PCS | 0H5U7ZZ | Destruction of Left Breast, Via Opening                      |  |
| Breast | ICD-10-PCS | 0H5U8ZZ | Destruction of Left Breast, Endo                             |  |
| Breast | ICD-10-PCS | 0H5UXZZ | Destruction of Left Breast, External Approach                |  |
| Breast | ICD-10-PCS | 0H5V0ZZ | Destruction of Bilateral Breast, Open Approach               |  |
| Breast | ICD-10-PCS | 0H5V3ZZ | Destruction of Bilateral Breast, Percutaneous Approach       |  |
| Breast | ICD-10-PCS | 0H5V7ZZ | Destruction of Bilateral Breast, Via Opening                 |  |
| Breast | ICD-10-PCS | 0H5V8ZZ | Destruction of Bilateral Breast, Endo                        |  |
| Breast | ICD-10-PCS | 0H5VXZZ | Destruction of Bilateral Breast, External Approach           |  |
| Breast | ICD-10-PCS | 0HBT0ZZ | Excision of Right Breast, Open Approach                      |  |
| Breast | ICD-10-PCS | 0HBT3ZZ | Excision of Right Breast, Percutaneous Approach              |  |
| Breast | ICD-10-PCS | 0HBT7ZZ | Excision of Right Breast, Via Natural or Artificial Opening  |  |
| Breast | ICD-10-PCS | 0HBT8ZZ | Excision of Right Breast, Endo                               |  |
| Breast | ICD-10-PCS | 0HBTXZZ | Excision of Right Breast, External Approach                  |  |
| Breast | ICD-10-PCS | 0HBU0ZZ | Excision of Left Breast, Open Approach                       |  |
| Breast | ICD-10-PCS | 0HBU3ZZ | Excision of Left Breast, Percutaneous Approach               |  |
| Breast | ICD-10-PCS | 0HBU7ZZ | Excision of Left Breast, Via Natural or Artificial Opening   |  |
| Breast | ICD-10-PCS | 0HBU8ZZ | Excision of Left Breast, Endo                                |  |

|           |            |         |                                                                                          |            |
|-----------|------------|---------|------------------------------------------------------------------------------------------|------------|
| Breast    | ICD-10-PCS | 0HBUXZZ | Excision of Left Breast, External Approach                                               |            |
| Breast    | ICD-10-PCS | 0HBV0ZZ | Excision of Bilateral Breast, Open Approach                                              |            |
| Breast    | ICD-10-PCS | 0HBV3ZZ | Excision of Bilateral Breast, Percutaneous Approach                                      |            |
| Breast    | ICD-10-PCS | 0HBV7ZZ | Excision of Bilateral Breast, Via Opening                                                |            |
| Breast    | ICD-10-PCS | 0HBV8ZZ | Excision of Bilateral Breast, Endo                                                       |            |
| Breast    | ICD-10-PCS | 0HBVXZZ | Excision of Bilateral Breast, External Approach                                          |            |
| Breast    | ICD-10-PCS | 0HTT0ZZ | Resection of Right Breast, Open Approach                                                 |            |
| Breast    | ICD-10-PCS | 0HTU0ZZ | Resection of Left Breast, Open Approach                                                  |            |
| Breast    | ICD-10-PCS | 0HTV0ZZ | Resection of Bilateral Breast, Open Approach                                             |            |
| Breast    | ICD-10-PCS | 0HX5XZZ | Transfer Chest Skin, External Approach                                                   |            |
| Breast    | ICD-10-PCS | 0KTH0ZZ | Resection of Right Thorax Muscle, Open Approach                                          |            |
| Breast    | ICD-10-PCS | 0KTJ0ZZ | Resection of Left Thorax Muscle, Open Approach                                           |            |
| Breast    | CPT        | 19120   | Removal of breast lesion                                                                 |            |
| Breast    | CPT        | 19125   | Excision breast lesion                                                                   |            |
| Breast    | CPT        | 19126   | Excision addl breast lesion                                                              |            |
| Breast    | CPT        | 19294   | Prep of tumor cavity, placement radiation tx applicator for IORT concurr partial mastect |            |
| Breast    | CPT        | 19301   | Partial mastectomy                                                                       |            |
| Breast    | CPT        | 19302   | Partial with axillary lymphadenectomy                                                    |            |
| Breast    | CPT        | 19303   | Simple mastectomy                                                                        |            |
| Breast    | CPT        | 19304   | Subcutaneous mastectomy                                                                  |            |
| Breast    | CPT        | 19305   | Radical mastectomy                                                                       |            |
| Breast    | CPT        | 19306   | Radical mastectomy                                                                       |            |
| Breast    | CPT        | 19307   | Modified radical mastectomy                                                              |            |
| Breast    | CPT        | 28525   | Lumpectomy with sentinel node biopsy                                                     |            |
| Female GU | ICD-9-CM   | 65.49   | Oth uni salpingo-oophor                                                                  |            |
| Female GU | ICD-9-CM   | 65.51   | Oth remove both ovaries                                                                  |            |
| Female GU | ICD-9-CM   | 65.52   | Oth remove remain ovary                                                                  |            |
| Female GU | ICD-9-CM   | 65.53   | Lap remove both ovaries                                                                  |            |
| Female GU | ICD-9-CM   | 65.61   | Oth remove ovaries/tubes                                                                 |            |
| Female GU | ICD-9-CM   | 65.62   | Oth remove rem ova/tube                                                                  |            |
| Female GU | ICD-9-CM   | 68.31   | Lap scervic hysterectomy                                                                 |            |
| Female GU | ICD-9-CM   | 68.39   | Subtotl abd hyst NEC/NOS                                                                 |            |
| Female GU | ICD-9-CM   | 68.41   | Lap total abdominal hyst                                                                 |            |
| Female GU | ICD-9-CM   | 68.49   | Total abd hyst NEC/NOS                                                                   |            |
| Female GU | ICD-9-CM   | 68.51   | Lap ast vag hysterectomy                                                                 |            |
| Female GU | ICD-9-CM   | 68.61   | Lap radical abdomnl hyst                                                                 |            |
| Female GU | ICD-9-CM   | 68.69   | Radical abd hyst NEC/NOS                                                                 |            |
| Female GU | ICD-9-CM   | 68.71   | Lap radical vaginal hyst                                                                 |            |
| Female GU | ICD-9-CM   | 68.79   | Radical vag hyst NEC/NOS                                                                 |            |
| Female GU | ICD-9-CM   | 68.8    | Pelvic evisceration                                                                      |            |
| Female GU | ICD-9-CM   | 68.9    | Hysterectomy NEC/NOS                                                                     |            |
| Female GU | ICD-10-PCS | 0TTB0ZZ | Resection of Bladder, Open Approach                                                      | Cystectomy |
| Female GU | ICD-10-PCS | 0TTD0ZZ | Resection of Urethra, Open Approach                                                      |            |

|           |            |         |                                                                                           |  |
|-----------|------------|---------|-------------------------------------------------------------------------------------------|--|
| Female GU | ICD-10-PCS | 0U508ZZ | Destruction of Right Ovary, Via Natural or Artificial Opening Endoscopic                  |  |
| Female GU | ICD-10-PCS | 0U518ZZ | Destruction of Left Ovary, Via Natural or Artificial Opening Endoscopic                   |  |
| Female GU | ICD-10-PCS | 0U528ZZ | Destruction of Bilateral Ovaries, Via Natural or Artificial Opening Endoscopic            |  |
| Female GU | ICD-10-PCS | 0U548ZZ | Destruction of Uterine Supporting Structure, Via Natural or Artificial Opening Endoscopic |  |
| Female GU | ICD-10-PCS | 0UT00ZZ | Resection of Right Ovary, Open Approach                                                   |  |
| Female GU | ICD-10-PCS | 0UT07ZZ | Resection of Right Ovary, Via Natural or Artificial Opening                               |  |
| Female GU | ICD-10-PCS | 0UT08ZZ | Resection of Right Ovary, Endo                                                            |  |
| Female GU | ICD-10-PCS | 0UT0FZZ | Resection of Right Ovary, Via Opening w Perc Endo                                         |  |
| Female GU | ICD-10-PCS | 0UT10ZZ | Resection of Left Ovary, Open Approach                                                    |  |
| Female GU | ICD-10-PCS | 0UT17ZZ | Resection of Left Ovary, Via Natural or Artificial Opening                                |  |
| Female GU | ICD-10-PCS | 0UT18ZZ | Resection of Left Ovary, Endo                                                             |  |
| Female GU | ICD-10-PCS | 0UT1FZZ | Resection of Left Ovary, Via Opening w Perc Endo                                          |  |
| Female GU | ICD-10-PCS | 0UT20ZZ | Resection of Bilateral Ovaries, Open Approach                                             |  |
| Female GU | ICD-10-PCS | 0UT24ZZ | Resection of Bilateral Ovaries, Perc Endo Approach                                        |  |
| Female GU | ICD-10-PCS | 0UT27ZZ | Resection of Bilateral Ovaries, Via Opening                                               |  |
| Female GU | ICD-10-PCS | 0UT28ZZ | Resection of Bilateral Ovaries, Endo                                                      |  |
| Female GU | ICD-10-PCS | 0UT2FZZ | Resection of Bilateral Ovaries, Via Opening w Perc Endo                                   |  |
| Female GU | ICD-10-PCS | 0UT40ZZ | Resection of Uterine Supporting Structure, Open Approach                                  |  |
| Female GU | ICD-10-PCS | 0UT44ZZ | Resection of Uterine Support Struct, Perc Endo Approach                                   |  |
| Female GU | ICD-10-PCS | 0UT70ZZ | Resection of Bilateral Fallopian Tubes, Open Approach                                     |  |
| Female GU | ICD-10-PCS | 0UT90ZL | Resection of Uterus, Supracervical, Open Approach                                         |  |
| Female GU | ICD-10-PCS | 0UT90ZZ | Resection of Uterus, Open Approach                                                        |  |
| Female GU | ICD-10-PCS | 0UT94ZL | Resection of Uterus, Supracervical, Percutaneous Endoscopic Approach                      |  |
| Female GU | ICD-10-PCS | 0UT94ZZ | Resection of Uterus, Percutaneous Endoscopic Approach                                     |  |
| Female GU | ICD-10-PCS | 0UT97ZL | Resection of Uterus, Supracervical, Via Natural or Artificial Opening                     |  |
| Female GU | ICD-10-PCS | 0UT97ZZ | Resection of Uterus, Via Natural or Artificial Opening                                    |  |
| Female GU | ICD-10-PCS | 0UT98ZL | Resection of Uterus, Supracervical, Via Natural or Artificial Opening Endoscopic          |  |
| Female GU | ICD-10-PCS | 0UT98ZZ | Resection of Uterus, Endo                                                                 |  |

|                   |            |         |                                                                                                               |               |
|-------------------|------------|---------|---------------------------------------------------------------------------------------------------------------|---------------|
| Female GU         | ICD-10-PCS | 0UT9FZL | Resection of Uterus, Supracervical, Via Natural or Artificial Opening With Percutaneous Endoscopic Assistance |               |
| Female GU         | ICD-10-PCS | 0UT9FZZ | Resection of Uterus, Via Opening w Perc Endo                                                                  |               |
| Female GU         | ICD-10-PCS | 0UTC0ZZ | Resection of Cervix, Open Approach                                                                            |               |
| Female GU         | ICD-10-PCS | 0UTC4ZZ | Resection of Cervix, Percutaneous Endoscopic Approach                                                         |               |
| Female GU         | ICD-10-PCS | 0UTC7ZZ | Resection of Cervix, Via Natural or Artificial Opening                                                        |               |
| Female GU         | ICD-10-PCS | 0UTC8ZZ | Resection of Cervix, Endo                                                                                     |               |
| Female GU         | ICD-10-PCS | 0UTG0ZZ | Resection of Vagina, Open Approach                                                                            |               |
| Female GU         | CPT        | 58548   | Lap radical hyst                                                                                              |               |
| Female GU         | CPT        | 58550   | Laparo-asst vag hysterectomy                                                                                  |               |
| Female GU         | CPT        | 58552   | Laparo-vag hyst incl t/o                                                                                      |               |
| Female GU         | CPT        | 58950   | Resect ovarian malignancy                                                                                     |               |
| Female GU         | CPT        | 58953   | Tah rad dissect for debulk                                                                                    |               |
| Gastro/Esophageal | ICD-9-CM   | 42.40   | Esophagectomy, not otherwise specified                                                                        | Esophagectomy |
| Gastro/Esophageal | ICD-9-CM   | 42.41   | Partial esophagectomy                                                                                         | Esophagectomy |
| Gastro/Esophageal | ICD-9-CM   | 42.42   | Total esophagectomy                                                                                           | Esophagectomy |
| Gastro/Esophageal | ICD-9-CM   | 42.51   | Intrathoracic anastomosis of esophagus                                                                        |               |
| Gastro/Esophageal | ICD-9-CM   | 42.52   | Intrathoracic anastomosis of esophagus                                                                        |               |
| Gastro/Esophageal | ICD-9-CM   | 42.53   | Intrathoracic anastomosis of esophagus                                                                        |               |
| Gastro/Esophageal | ICD-9-CM   | 42.54   | Intrathoracic anastomosis of esophagus                                                                        |               |
| Gastro/Esophageal | ICD-9-CM   | 42.55   | Intrathoracic anastomosis of esophagus                                                                        |               |
| Gastro/Esophageal | ICD-9-CM   | 42.56   | Intrathoracic anastomosis of esophagus                                                                        |               |
| Gastro/Esophageal | ICD-9-CM   | 42.58   | Intrathoracic anastomosis of esophagus                                                                        |               |
| Gastro/Esophageal | ICD-9-CM   | 42.59   | Intrathoracic anastomosis of esophagus                                                                        |               |
| Gastro/Esophageal | ICD-9-CM   | 42.61   | Antesternal anastomosis of esophagus                                                                          |               |
| Gastro/Esophageal | ICD-9-CM   | 42.62   | Antesternal anastomosis of esophagus                                                                          |               |
| Gastro/Esophageal | ICD-9-CM   | 42.63   | Antesternal anastomosis of esophagus                                                                          |               |
| Gastro/Esophageal | ICD-9-CM   | 42.64   | Antesternal anastomosis of esophagus                                                                          |               |
| Gastro/Esophageal | ICD-9-CM   | 42.65   | Antesternal anastomosis of esophagus                                                                          |               |
| Gastro/Esophageal | ICD-9-CM   | 42.69   | Antesternal anastomosis of esophagus                                                                          |               |
| Gastro/Esophageal | ICD-9-CM   | 43.42   | Local excision of other lesion or tissue of stomach                                                           |               |
| Gastro/Esophageal | ICD-9-CM   | 43.5    | Partial gastrectomy with anastomosis to esophagus                                                             | Gastrectomy   |
| Gastro/Esophageal | ICD-9-CM   | 43.6    | Partial gastrectomy with anastomosis to duodenum                                                              | Gastrectomy   |

|                   |            |         |                                                              |             |
|-------------------|------------|---------|--------------------------------------------------------------|-------------|
| Gastro/Esophageal | ICD-9-CM   | 43.7    | Partial gastrectomy with anastomosis to jejunum              | Gastrectomy |
| Gastro/Esophageal | ICD-9-CM   | 43.81   | Partial gastrectomy with jejunal transposition               | Gastrectomy |
| Gastro/Esophageal | ICD-9-CM   | 43.82   | Laparoscopic vertical (sleeve) gastrectomy                   |             |
| Gastro/Esophageal | ICD-9-CM   | 43.89   | Open and other partial gastrectomy                           | Gastrectomy |
| Gastro/Esophageal | ICD-9-CM   | 43.91   | Total gastrectomy with intestinal interposition              | Gastrectomy |
| Gastro/Esophageal | ICD-9-CM   | 43.99   | Other total gastrectomy                                      | Gastrectomy |
| Gastro/Esophageal | ICD-9-CM   | 46.39   | Enterostomy NEC                                              |             |
| Gastro/Esophageal | ICD-10-PCS | 0D15074 | Bypass Esophagus to Cutaneous with Autol Sub, Open Approach  |             |
| Gastro/Esophageal | ICD-10-PCS | 0D15076 | Bypass Esophagus to Stomach with Autol Sub, Open Approach    |             |
| Gastro/Esophageal | ICD-10-PCS | 0D15079 | Bypass Esophagus to Duodenum with Autol Sub, Open Approach   |             |
| Gastro/Esophageal | ICD-10-PCS | 0D1507A | Bypass Esophagus to Jejunum with Autol Sub, Open Approach    |             |
| Gastro/Esophageal | ICD-10-PCS | 0D1507B | Bypass Esophagus to Ileum with Autol Sub, Open Approach      |             |
| Gastro/Esophageal | ICD-10-PCS | 0D150J4 | Bypass Esophagus to Cutaneous with Synth Sub, Open Approach  |             |
| Gastro/Esophageal | ICD-10-PCS | 0D150J6 | Bypass Esophagus to Stomach with Synth Sub, Open Approach    |             |
| Gastro/Esophageal | ICD-10-PCS | 0D150J9 | Bypass Esophagus to Duodenum with Synth Sub, Open Approach   |             |
| Gastro/Esophageal | ICD-10-PCS | 0D150JA | Bypass Esophagus to Jejunum with Synth Sub, Open Approach    |             |
| Gastro/Esophageal | ICD-10-PCS | 0D150JB | Bypass Esophagus to Ileum with Synth Sub, Open Approach      |             |
| Gastro/Esophageal | ICD-10-PCS | 0D150K4 | Bypass Esophagus to Cutaneous with Nonaut Sub, Open Approach |             |
| Gastro/Esophageal | ICD-10-PCS | 0D150K6 | Bypass Esophagus to Stomach with Nonaut Sub, Open Approach   |             |
| Gastro/Esophageal | ICD-10-PCS | 0D150K9 | Bypass Esophagus to Duodenum with Nonaut Sub, Open Approach  |             |
| Gastro/Esophageal | ICD-10-PCS | 0D150KA | Bypass Esophagus to Jejunum with Nonaut Sub, Open Approach   |             |
| Gastro/Esophageal | ICD-10-PCS | 0D150KB | Bypass Esophagus to Ileum with Nonaut Sub, Open Approach     |             |
| Gastro/Esophageal | ICD-10-PCS | 0D150Z4 | Bypass Esophagus to Cutaneous, Open Approach                 |             |
| Gastro/Esophageal | ICD-10-PCS | 0D150Z6 | Bypass Esophagus to Stomach, Open Approach                   |             |
| Gastro/Esophageal | ICD-10-PCS | 0D150Z9 | Bypass Esophagus to Duodenum, Open Approach                  |             |
| Gastro/Esophageal | ICD-10-PCS | 0D150ZA | Bypass Esophagus to Jejunum, Open Approach                   |             |
| Gastro/Esophageal | ICD-10-PCS | 0D150ZB | Bypass Esophagus to Ileum, Open Approach                     |             |
| Gastro/Esophageal | ICD-10-PCS | 0D153J4 | Bypass Esophagus to Cutaneous with Synth Sub, Perc Approach  |             |
| Gastro/Esophageal | ICD-10-PCS | 0D15474 | Bypass Esophagus to Cutan with Autol Sub, Perc Endo Approach |             |
| Gastro/Esophageal | ICD-10-PCS | 0D15476 | Bypass Esophag to Stomach with Autol Sub, Perc Endo Approach |             |
| Gastro/Esophageal | ICD-10-PCS | 0D15479 | Bypass Esophag to Duoden with Autol Sub, Perc Endo Approach  |             |

|                   |            |         |                                                              |  |
|-------------------|------------|---------|--------------------------------------------------------------|--|
| Gastro/Esophageal | ICD-10-PCS | 0D1547A | Bypass Esophag to Jejunum with Autol Sub, Perc Endo Approach |  |
| Gastro/Esophageal | ICD-10-PCS | 0D1547B | Bypass Esophagus to Ileum with Autol Sub, Perc Endo Approach |  |
| Gastro/Esophageal | ICD-10-PCS | 0D154J4 | Bypass Esophagus to Cutan with Synth Sub, Perc Endo Approach |  |
| Gastro/Esophageal | ICD-10-PCS | 0D154J6 | Bypass Esophag to Stomach with Synth Sub, Perc Endo Approach |  |
| Gastro/Esophageal | ICD-10-PCS | 0D154J9 | Bypass Esophag to Duoden with Synth Sub, Perc Endo Approach  |  |
| Gastro/Esophageal | ICD-10-PCS | 0D154JA | Bypass Esophag to Jejunum with Synth Sub, Perc Endo Approach |  |
| Gastro/Esophageal | ICD-10-PCS | 0D154JB | Bypass Esophagus to Ileum with Synth Sub, Perc Endo Approach |  |
| Gastro/Esophageal | ICD-10-PCS | 0D154K4 | Bypass Esophag to Cutan with Nonaut Sub, Perc Endo Approach  |  |
| Gastro/Esophageal | ICD-10-PCS | 0D154K6 | Bypass Esophag to Stomach w Nonaut Sub, Perc Endo            |  |
| Gastro/Esophageal | ICD-10-PCS | 0D154K9 | Bypass Esophag to Duoden with Nonaut Sub, Perc Endo Approach |  |
| Gastro/Esophageal | ICD-10-PCS | 0D154KA | Bypass Esophag to Jejunum w Nonaut Sub, Perc Endo            |  |
| Gastro/Esophageal | ICD-10-PCS | 0D154KB | Bypass Esophag to Ileum with Nonaut Sub, Perc Endo Approach  |  |
| Gastro/Esophageal | ICD-10-PCS | 0D154Z4 | Bypass Esophagus to Cutaneous, Perc Endo Approach            |  |
| Gastro/Esophageal | ICD-10-PCS | 0D154Z6 | Bypass Esophagus to Stomach, Perc Endo Approach              |  |
| Gastro/Esophageal | ICD-10-PCS | 0D154Z9 | Bypass Esophagus to Duodenum, Perc Endo Approach             |  |
| Gastro/Esophageal | ICD-10-PCS | 0D154ZA | Bypass Esophagus to Jejunum, Perc Endo Approach              |  |
| Gastro/Esophageal | ICD-10-PCS | 0D154ZB | Bypass Esophagus to Ileum, Percutaneous Endoscopic Approach  |  |
| Gastro/Esophageal | ICD-10-PCS | 0D15876 | Bypass Esophagus to Stomach with Autol Sub, Endo             |  |
| Gastro/Esophageal | ICD-10-PCS | 0D15879 | Bypass Esophagus to Duodenum with Autol Sub, Endo            |  |
| Gastro/Esophageal | ICD-10-PCS | 0D1587A | Bypass Esophagus to Jejunum with Autol Sub, Endo             |  |
| Gastro/Esophageal | ICD-10-PCS | 0D1587B | Bypass Esophagus to Ileum with Autol Sub, Endo               |  |
| Gastro/Esophageal | ICD-10-PCS | 0D158J6 | Bypass Esophagus to Stomach with Synthetic Substitute, Endo  |  |
| Gastro/Esophageal | ICD-10-PCS | 0D158J9 | Bypass Esophagus to Duodenum with Synthetic Substitute, Endo |  |
| Gastro/Esophageal | ICD-10-PCS | 0D158JA | Bypass Esophagus to Jejunum with Synthetic Substitute, Endo  |  |
| Gastro/Esophageal | ICD-10-PCS | 0D158JB | Bypass Esophagus to Ileum with Synthetic Substitute, Endo    |  |
| Gastro/Esophageal | ICD-10-PCS | 0D158K6 | Bypass Esophagus to Stomach with Nonaut Sub, Endo            |  |
| Gastro/Esophageal | ICD-10-PCS | 0D158K9 | Bypass Esophagus to Duodenum with Nonaut Sub, Endo           |  |
| Gastro/Esophageal | ICD-10-PCS | 0D158KA | Bypass Esophagus to Jejunum with Nonaut Sub, Endo            |  |
| Gastro/Esophageal | ICD-10-PCS | 0D158KB | Bypass Esophagus to Ileum with Nonaut Sub, Endo              |  |
| Gastro/Esophageal | ICD-10-PCS | 0D158Z6 | Bypass Esophagus to Stomach, Endo                            |  |



|                    |            |         |                                                                         |               |
|--------------------|------------|---------|-------------------------------------------------------------------------|---------------|
| Gastro/Esoophageal | ICD-10-PCS | 0D158Z9 | Bypass Esophagus to Duodenum, Endo                                      |               |
| Gastro/Esoophageal | ICD-10-PCS | 0D158ZA | Bypass Esophagus to Jejunum, Endo                                       |               |
| Gastro/Esoophageal | ICD-10-PCS | 0D158ZB | Bypass Esophagus to Ileum, Endo                                         |               |
| Gastro/Esoophageal | ICD-10-PCS | 0DB40ZZ | Excision of Esophagogastric Junction, Open Approach                     | Gastrectomy   |
| Gastro/Esoophageal | ICD-10-PCS | 0DB43ZZ | Excision of Esophagogastric Junction, Percutaneous Approach             | Gastrectomy   |
| Gastro/Esoophageal | ICD-10-PCS | 0DB44ZZ | Excision of Esophagogastric Junction, Percutaneous Endoscopic Approach  | Gastrectomy   |
| Gastro/Esoophageal | ICD-10-PCS | 0DB47ZZ | Excision of Esophagogastric Junction, Via Natural or Artificial Opening | Gastrectomy   |
| Gastro/Esoophageal | ICD-10-PCS | 0DB50ZZ | Excision of Esophagus, Open Approach                                    | Esophagectomy |
| Gastro/Esoophageal | ICD-10-PCS | 0DB53ZZ | Excision of Esophagus, Percutaneous Approach                            | Esophagectomy |
| Gastro/Esoophageal | ICD-10-PCS | 0DB57ZZ | Excision of Esophagus, Via Natural or Artificial Opening                | Esophagectomy |
| Gastro/Esoophageal | ICD-10-PCS | 0DB60ZZ | Excision of Stomach, Open Approach                                      | Gastrectomy   |
| Gastro/Esoophageal | ICD-10-PCS | 0DB63ZZ | Excision of Stomach, Percutaneous Approach                              | Gastrectomy   |
| Gastro/Esoophageal | ICD-10-PCS | 0DB64Z3 | Excision of Stomach, Percutaneous Endoscopic Approach, Vert             | Gastrectomy   |
| Gastro/Esoophageal | ICD-10-PCS | 0DB64ZZ | Excision of Stomach, Percutaneous Endoscopic Approach                   | Gastrectomy   |
| Gastro/Esoophageal | ICD-10-PCS | 0DB67ZZ | Excision of Stomach, Via Natural or Artificial Opening                  | Gastrectomy   |
| Gastro/Esoophageal | ICD-10-PCS | 0DB68ZZ | Excision of Stomach, Endo                                               | Gastrectomy   |
| Gastro/Esoophageal | ICD-10-PCS | 0DH80UZ | Insertion of Feeding Device into Small Intest, Open Approach            |               |
| Gastro/Esoophageal | ICD-10-PCS | 0DH83UZ | Insertion of Feeding Device into Small Intest, Perc Approach            |               |
| Gastro/Esoophageal | ICD-10-PCS | 0DH84UZ | Insert of Feeding Dev into Small Intest, Perc Endo Approach             |               |
| Gastro/Esoophageal | ICD-10-PCS | 0DH87UZ | Insertion of Feeding Device into Small Intest, Via Opening              |               |
| Gastro/Esoophageal | ICD-10-PCS | 0DH88UZ | Insertion of Feeding Device into Small Intest, Endo                     |               |
| Gastro/Esoophageal | ICD-10-PCS | 0DH90UZ | Insertion of Feeding Device into Duodenum, Open Approach                |               |
| Gastro/Esoophageal | ICD-10-PCS | 0DH93UZ | Insertion of Feeding Device into Duodenum, Perc Approach                |               |
| Gastro/Esoophageal | ICD-10-PCS | 0DH94UZ | Insertion of Feeding Dev into Duodenum, Perc Endo Approach              |               |
| Gastro/Esoophageal | ICD-10-PCS | 0DH97UZ | Insertion of Feeding Device into Duodenum, Via Opening                  |               |
| Gastro/Esoophageal | ICD-10-PCS | 0DH98UZ | Insertion of Feeding Device into Duodenum, Endo                         |               |
| Gastro/Esoophageal | ICD-10-PCS | 0DHA0UZ | Insertion of Feeding Device into Jejunum, Open Approach                 |               |
| Gastro/Esoophageal | ICD-10-PCS | 0DHA7UZ | Insertion of Feeding Device into Jejunum, Via Opening                   |               |
| Gastro/Esoophageal | ICD-10-PCS | 0DT10ZZ | Resection of Upper Esophagus, Open Approach                             | Esophagectomy |

|                   |            |         |                                                                                     |               |
|-------------------|------------|---------|-------------------------------------------------------------------------------------|---------------|
| Gastro/Esophageal | ICD-10-PCS | 0DT14ZZ | Resection of Upper Esophagus, Percutaneous Endoscopic                               | Esophagectomy |
| Gastro/Esophageal | ICD-10-PCS | 0DT17ZZ | Resection of Upper Esophagus, Via Natural or Artificial Opening                     | Esophagectomy |
| Gastro/Esophageal | ICD-10-PCS | 0DT18ZZ | Resection of Upper Esophagus, Via Natural or Artificial Opening Endoscopic          | Esophagectomy |
| Gastro/Esophageal | ICD-10-PCS | 0DT20ZZ | Resection of Middle Esophagus, Open Approach                                        | Esophagectomy |
| Gastro/Esophageal | ICD-10-PCS | 0DT24ZZ | Resection of Middle Esophagus, Percutaneous Endoscopic                              | Esophagectomy |
| Gastro/Esophageal | ICD-10-PCS | 0DT27ZZ | Resection of Middle Esophagus, Via Natural or Artificial Opening                    | Esophagectomy |
| Gastro/Esophageal | ICD-10-PCS | 0DT28ZZ | Resection of Middle Esophagus, Via Natural or Artificial Opening Endoscopic         | Esophagectomy |
| Gastro/Esophageal | ICD-10-PCS | 0DT30ZZ | Resection of Lower Esophagus, Open Approach                                         | Esophagectomy |
| Gastro/Esophageal | ICD-10-PCS | 0DT34ZZ | Resection of Lower Esophagus, Percutaneous Endoscopic                               | Esophagectomy |
| Gastro/Esophageal | ICD-10-PCS | 0DT37ZZ | Resection of Lower Esophagus, Via Natural or Artificial Opening                     | Esophagectomy |
| Gastro/Esophageal | ICD-10-PCS | 0DT38ZZ | Resection of Lower Esophagus, Via Natural or Artificial Opening Endoscopic          | Esophagectomy |
| Gastro/Esophageal | ICD-10-PCS | 0DT40ZZ | Resection of Esophagogastric Junction, Open Approach                                | Gastrectomy   |
| Gastro/Esophageal | ICD-10-PCS | 0DT44ZZ | Resection of Esophagogastric Junction, Percutaneous Endoscopic Approach             | Gastrectomy   |
| Gastro/Esophageal | ICD-10-PCS | 0DT47ZZ | Resection of Esophagogastric Junction, Via Natural or Artificial Opening            | Gastrectomy   |
| Gastro/Esophageal | ICD-10-PCS | 0DT48ZZ | Resection of Esophagogastric Junction, Via Natural or Artificial Opening Endoscopic | Gastrectomy   |
| Gastro/Esophageal | ICD-10-PCS | 0DT50ZZ | Resection of Esophagus, Open Approach                                               | Esophagectomy |
| Gastro/Esophageal | ICD-10-PCS | 0DT54ZZ | Resection of Esophagus, Percutaneous Endoscopic Approach                            | Esophagectomy |
| Gastro/Esophageal | ICD-10-PCS | 0DT57ZZ | Resection of Esophagus, Via Natural or Artificial Opening                           | Esophagectomy |
| Gastro/Esophageal | ICD-10-PCS | 0DT58ZZ | Resection of Esophagus, Endo                                                        | Esophagectomy |
| Gastro/Esophageal | ICD-10-PCS | 0DT60ZZ | Resection of Stomach, Open Approach                                                 | Gastrectomy   |
| Gastro/Esophageal | ICD-10-PCS | 0DT64ZZ | Resection of Stomach, Percutaneous Endoscopic Approach                              | Gastrectomy   |
| Gastro/Esophageal | ICD-10-PCS | 0DT67ZZ | Resection of Stomach, Via Natural or Artificial Opening                             | Gastrectomy   |
| Gastro/Esophageal | ICD-10-PCS | 0DT68ZZ | Resection of Stomach, Endo                                                          | Gastrectomy   |
| Gastro/Esophageal | ICD-10-PCS | 0DT70ZZ | Resection of Stomach, Pylorus, Open Approach                                        | Gastrectomy   |
| Gastro/Esophageal | ICD-10-PCS | 0DT74ZZ | Resection of Stomach, Pylorus, Percutaneous Endoscopic Approach                     | Gastrectomy   |
| Gastro/Esophageal | ICD-10-PCS | 0DT77ZZ | Resection of Stomach, Pylorus, Via Natural or Artificial Opening                    | Gastrectomy   |

|                   |            |         |                                                                                                                                                             |             |
|-------------------|------------|---------|-------------------------------------------------------------------------------------------------------------------------------------------------------------|-------------|
| Gastro/Esophageal | ICD-10-PCS | 0DT78ZZ | Resection of Stomach, Pylorus, Via Natural or Artificial Opening Endoscopic                                                                                 | Gastrectomy |
| Gastro/Esophageal | ICD-10-PCS | 0DX60Z5 | Transfer Stomach to Esophagus, Open Approach                                                                                                                |             |
| Gastro/Esophageal | ICD-10-PCS | 0DX64Z5 | Transfer Stomach to Esophagus, Perc Endo Approach                                                                                                           |             |
| Gastro/Esophageal | ICD-10-PCS | 0DX80Z5 | Transfer Small Intestine to Esophagus, Open Approach                                                                                                        |             |
| Gastro/Esophageal | ICD-10-PCS | 0DX84Z5 | Transfer Small Intestine to Esophagus, Perc Endo Approach                                                                                                   |             |
| Gastro/Esophageal | ICD-10-PCS | 0DXE0Z5 | Transfer Large Intestine to Esophagus, Open Approach                                                                                                        |             |
| Gastro/Esophageal | ICD-10-PCS | 0DXE4Z5 | Transfer Large Intestine to Esophagus, Perc Endo Approach                                                                                                   |             |
| Gastro/Esophageal | CPT        | 43122   | Partial esophagectomy, thoracoabdominal or abdominal approach, with or without proximal gastrectomy; with esophagogastrostomy, with or without pyloroplasty |             |
| Gastro/Esophageal | CPT        | 43276   | Ercp stent exchange w/dilate                                                                                                                                |             |
| Gastro/Esophageal | CPT        | 43277   | Ercp ea duct/ampulla dilate                                                                                                                                 |             |
| Head and Neck     | ICD-9-CM   | 21.4    | Resection of nose                                                                                                                                           |             |
| Head and Neck     | ICD-9-CM   | 21.5    | Submuc nasal sept resect                                                                                                                                    |             |
| Head and Neck     | ICD-9-CM   | 21.69   | Turbinectomy NEC                                                                                                                                            |             |
| Head and Neck     | ICD-9-CM   | 25.2    | Partial glossectomy                                                                                                                                         |             |
| Head and Neck     | ICD-9-CM   | 25.3    | Complete glossectomy                                                                                                                                        |             |
| Head and Neck     | ICD-9-CM   | 25.4    | Radical glossectomy                                                                                                                                         |             |
| Head and Neck     | ICD-9-CM   | 27.42   | Wide excision of lip les                                                                                                                                    |             |
| Head and Neck     | ICD-9-CM   | 27.57   | Pedicle attach to mouth                                                                                                                                     |             |
| Head and Neck     | ICD-9-CM   | 29.33   | Pharyngectomy                                                                                                                                               |             |
| Head and Neck     | ICD-9-CM   | 30.1    | Hemilaryngectomy                                                                                                                                            |             |
| Head and Neck     | ICD-9-CM   | 30.21   | Epiglottidectomy                                                                                                                                            |             |
| Head and Neck     | ICD-9-CM   | 30.22   | Vocal cordectomy                                                                                                                                            |             |
| Head and Neck     | ICD-9-CM   | 30.29   | Other part laryngectomy                                                                                                                                     |             |
| Head and Neck     | ICD-9-CM   | 30.3    | Complete laryngectomy                                                                                                                                       |             |
| Head and Neck     | ICD-9-CM   | 30.4    | Radical laryngectomy                                                                                                                                        |             |
| Head and Neck     | ICD-9-CM   | 40.40   | Rad neck dissection NOS                                                                                                                                     |             |
| Head and Neck     | ICD-9-CM   | 40.42   | Bilat rad neck dissect                                                                                                                                      |             |
| Head and Neck     | ICD-9-CM   | 76.31   | Partial mandibulectomy                                                                                                                                      |             |
| Head and Neck     | ICD-9-CM   | 76.43   | Mandibular reconst NEC                                                                                                                                      |             |
| Head and Neck     | ICD-9-CM   | 76.45   | Tot face bone osect NEC                                                                                                                                     |             |
| Head and Neck     | ICD-10-PCS | 07T10ZZ | Resection of Right Neck Lymphatic, Open Approach                                                                                                            |             |
| Head and Neck     | ICD-10-PCS | 07T14ZZ | Resection of Right Neck Lymphatic, Perc Endo Approach                                                                                                       |             |
| Head and Neck     | ICD-10-PCS | 07T20ZZ | Resection of Left Neck Lymphatic, Open Approach                                                                                                             |             |
| Head and Neck     | ICD-10-PCS | 07T24ZZ | Resection of Left Neck Lymphatic, Perc Endo Approach                                                                                                        |             |
| Head and Neck     | ICD-10-PCS | 09BL0ZZ | Excision of Nasal Turbinate, Open Approach                                                                                                                  |             |
| Head and Neck     | ICD-10-PCS | 09BL3ZZ | Excision of Nasal Turbinate, Percutaneous Approach                                                                                                          |             |
| Head and Neck     | ICD-10-PCS | 09BL4ZZ | Excision of Nasal Turbinate, Perc Endo Approach                                                                                                             |             |
| Head and Neck     | ICD-10-PCS | 09BL7ZZ | Excision of Nasal Turbinate, Via Opening                                                                                                                    |             |
| Head and Neck     | ICD-10-PCS | 09BL8ZZ | Excision of Nasal Turbinate, Endo                                                                                                                           |             |

|               |            |         |                                                              |  |
|---------------|------------|---------|--------------------------------------------------------------|--|
| Head and Neck | ICD-10-PCS | 09BM0ZZ | Excision of Nasal Septum, Open Approach                      |  |
| Head and Neck | ICD-10-PCS | 09BM3ZZ | Excision of Nasal Septum, Percutaneous Approach              |  |
| Head and Neck | ICD-10-PCS | 09BM4ZZ | Excision of Nasal Septum, Percutaneous Endoscopic Approach   |  |
| Head and Neck | ICD-10-PCS | 09BN0ZZ | Excision of Nasopharynx, Open Approach                       |  |
| Head and Neck | ICD-10-PCS | 09BN3ZZ | Excision of Nasopharynx, Percutaneous Approach               |  |
| Head and Neck | ICD-10-PCS | 09BN4ZZ | Excision of Nasopharynx, Percutaneous Endoscopic Approach    |  |
| Head and Neck | ICD-10-PCS | 09BN7ZZ | Excision of Nasopharynx, Via Natural or Artificial Opening   |  |
| Head and Neck | ICD-10-PCS | 09BN8ZZ | Excision of Nasopharynx, Endo                                |  |
| Head and Neck | ICD-10-PCS | 09TK0ZZ | Resection of Nose, Open Approach                             |  |
| Head and Neck | ICD-10-PCS | 09TK4ZZ | Resection of Nose, Percutaneous Endoscopic Approach          |  |
| Head and Neck | ICD-10-PCS | 09TKXZZ | Resection of Nose, External Approach                         |  |
| Head and Neck | ICD-10-PCS | 09TL0ZZ | Resection of Nasal Turbinate, Open Approach                  |  |
| Head and Neck | ICD-10-PCS | 09TL4ZZ | Resection of Nasal Turbinate, Perc Endo Approach             |  |
| Head and Neck | ICD-10-PCS | 09TL7ZZ | Resection of Nasal Turbinate, Via Opening                    |  |
| Head and Neck | ICD-10-PCS | 09TL8ZZ | Resection of Nasal Turbinate, Endo                           |  |
| Head and Neck | ICD-10-PCS | 09TM0ZZ | Resection of Nasal Septum, Open Approach                     |  |
| Head and Neck | ICD-10-PCS | 09TM4ZZ | Resection of Nasal Septum, Percutaneous Endoscopic Approach  |  |
| Head and Neck | ICD-10-PCS | 09TN0ZZ | Resection of Nasopharynx, Open Approach                      |  |
| Head and Neck | ICD-10-PCS | 09TN4ZZ | Resection of Nasopharynx, Percutaneous Endoscopic Approach   |  |
| Head and Neck | ICD-10-PCS | 09TN7ZZ | Resection of Nasopharynx, Via Natural or Artificial Opening  |  |
| Head and Neck | ICD-10-PCS | 09TN8ZZ | Resection of Nasopharynx, Endo                               |  |
| Head and Neck | ICD-10-PCS | 0C5R0ZZ | Destruction of Epiglottis, Open Approach                     |  |
| Head and Neck | ICD-10-PCS | 0C5R3ZZ | Destruction of Epiglottis, Percutaneous Approach             |  |
| Head and Neck | ICD-10-PCS | 0C5R4ZZ | Destruction of Epiglottis, Percutaneous Endoscopic Approach  |  |
| Head and Neck | ICD-10-PCS | 0C5R7ZZ | Destruction of Epiglottis, Via Natural or Artificial Opening |  |
| Head and Neck | ICD-10-PCS | 0C5R8ZZ | Destruction of Epiglottis, Endo                              |  |
| Head and Neck | ICD-10-PCS | 0CB00ZZ | Excision of Upper Lip, Open Approach                         |  |
| Head and Neck | ICD-10-PCS | 0CB03ZZ | Excision of Upper Lip, Percutaneous Approach                 |  |
| Head and Neck | ICD-10-PCS | 0CB0XZZ | Excision of Upper Lip, External Approach                     |  |

|               |            |         |                                                           |  |
|---------------|------------|---------|-----------------------------------------------------------|--|
| Head and Neck | ICD-10-PCS | 0CB10ZZ | Excision of Lower Lip, Open Approach                      |  |
| Head and Neck | ICD-10-PCS | 0CB13ZZ | Excision of Lower Lip, Percutaneous Approach              |  |
| Head and Neck | ICD-10-PCS | 0CB1XZZ | Excision of Lower Lip, External Approach                  |  |
| Head and Neck | ICD-10-PCS | 0CB70ZZ | Excision of Tongue, Open Approach                         |  |
| Head and Neck | ICD-10-PCS | 0CB73ZZ | Excision of Tongue, Percutaneous Approach                 |  |
| Head and Neck | ICD-10-PCS | 0CB7XZZ | Excision of Tongue, External Approach                     |  |
| Head and Neck | ICD-10-PCS | 0CBM0ZZ | Excision of Pharynx, Open Approach                        |  |
| Head and Neck | ICD-10-PCS | 0CBM3ZZ | Excision of Pharynx, Percutaneous Approach                |  |
| Head and Neck | ICD-10-PCS | 0CBM4ZZ | Excision of Pharynx, Percutaneous Endoscopic Approach     |  |
| Head and Neck | ICD-10-PCS | 0CBM7ZZ | Excision of Pharynx, Via Natural or Artificial Opening    |  |
| Head and Neck | ICD-10-PCS | 0CBM8ZZ | Excision of Pharynx, Endo                                 |  |
| Head and Neck | ICD-10-PCS | 0CBR0ZZ | Excision of Epiglottis, Open Approach                     |  |
| Head and Neck | ICD-10-PCS | 0CBR3ZZ | Excision of Epiglottis, Percutaneous Approach             |  |
| Head and Neck | ICD-10-PCS | 0CBR4ZZ | Excision of Epiglottis, Percutaneous Endoscopic Approach  |  |
| Head and Neck | ICD-10-PCS | 0CBR7ZZ | Excision of Epiglottis, Via Natural or Artificial Opening |  |
| Head and Neck | ICD-10-PCS | 0CBR8ZZ | Excision of Epiglottis, Endo                              |  |
| Head and Neck | ICD-10-PCS | 0CBS0ZZ | Excision of Larynx, Open Approach                         |  |
| Head and Neck | ICD-10-PCS | 0CBS3ZZ | Excision of Larynx, Percutaneous Approach                 |  |
| Head and Neck | ICD-10-PCS | 0CBS4ZZ | Excision of Larynx, Percutaneous Endoscopic Approach      |  |
| Head and Neck | ICD-10-PCS | 0CBS7ZZ | Excision of Larynx, Via Natural or Artificial Opening     |  |
| Head and Neck | ICD-10-PCS | 0CBS8ZZ | Excision of Larynx, Endo                                  |  |
| Head and Neck | ICD-10-PCS | 0CBT0ZZ | Excision of Right Vocal Cord, Open Approach               |  |
| Head and Neck | ICD-10-PCS | 0CBT3ZZ | Excision of Right Vocal Cord, Percutaneous Approach       |  |
| Head and Neck | ICD-10-PCS | 0CBT4ZZ | Excision of Right Vocal Cord, Perc Endo Approach          |  |
| Head and Neck | ICD-10-PCS | 0CBT7ZZ | Excision of Right Vocal Cord, Via Opening                 |  |
| Head and Neck | ICD-10-PCS | 0CBT8ZZ | Excision of Right Vocal Cord, Endo                        |  |
| Head and Neck | ICD-10-PCS | 0CBV0ZZ | Excision of Left Vocal Cord, Open Approach                |  |
| Head and Neck | ICD-10-PCS | 0CBV3ZZ | Excision of Left Vocal Cord, Percutaneous Approach        |  |
| Head and Neck | ICD-10-PCS | 0CBV4ZZ | Excision of Left Vocal Cord, Perc Endo Approach           |  |
| Head and Neck | ICD-10-PCS | 0CBV7ZZ | Excision of Left Vocal Cord, Via Opening                  |  |
| Head and Neck | ICD-10-PCS | 0CBV8ZZ | Excision of Left Vocal Cord, Endo                         |  |

|               |            |         |                                                              |  |
|---------------|------------|---------|--------------------------------------------------------------|--|
| Head and Neck | ICD-10-PCS | 0CT70ZZ | Resection of Tongue, Open Approach                           |  |
| Head and Neck | ICD-10-PCS | 0CT7XZZ | Resection of Tongue, External Approach                       |  |
| Head and Neck | ICD-10-PCS | 0CTM0ZZ | Resection of Pharynx, Open Approach                          |  |
| Head and Neck | ICD-10-PCS | 0CTM4ZZ | Resection of Pharynx, Percutaneous Endoscopic Approach       |  |
| Head and Neck | ICD-10-PCS | 0CTM7ZZ | Resection of Pharynx, Via Natural or Artificial Opening      |  |
| Head and Neck | ICD-10-PCS | 0CTM8ZZ | Resection of Pharynx, Endo                                   |  |
| Head and Neck | ICD-10-PCS | 0CTR0ZZ | Resection of Epiglottis, Open Approach                       |  |
| Head and Neck | ICD-10-PCS | 0CTR4ZZ | Resection of Epiglottis, Percutaneous Endoscopic Approach    |  |
| Head and Neck | ICD-10-PCS | 0CTR7ZZ | Resection of Epiglottis, Via Natural or Artificial Opening   |  |
| Head and Neck | ICD-10-PCS | 0CTR8ZZ | Resection of Epiglottis, Endo                                |  |
| Head and Neck | ICD-10-PCS | 0CTS0ZZ | Resection of Larynx, Open Approach                           |  |
| Head and Neck | ICD-10-PCS | 0CTS4ZZ | Resection of Larynx, Percutaneous Endoscopic Approach        |  |
| Head and Neck | ICD-10-PCS | 0CTS7ZZ | Resection of Larynx, Via Natural or Artificial Opening       |  |
| Head and Neck | ICD-10-PCS | 0CTS8ZZ | Resection of Larynx, Endo                                    |  |
| Head and Neck | ICD-10-PCS | 0CTT0ZZ | Resection of Right Vocal Cord, Open Approach                 |  |
| Head and Neck | ICD-10-PCS | 0CTT4ZZ | Resection of Right Vocal Cord, Perc Endo Approach            |  |
| Head and Neck | ICD-10-PCS | 0CTT7ZZ | Resection of Right Vocal Cord, Via Opening                   |  |
| Head and Neck | ICD-10-PCS | 0CTT8ZZ | Resection of Right Vocal Cord, Endo                          |  |
| Head and Neck | ICD-10-PCS | 0CTV0ZZ | Resection of Left Vocal Cord, Open Approach                  |  |
| Head and Neck | ICD-10-PCS | 0CTV4ZZ | Resection of Left Vocal Cord, Perc Endo Approach             |  |
| Head and Neck | ICD-10-PCS | 0CTV7ZZ | Resection of Left Vocal Cord, Via Opening                    |  |
| Head and Neck | ICD-10-PCS | 0CTV8ZZ | Resection of Left Vocal Cord, Endo                           |  |
| Head and Neck | ICD-10-PCS | 0CX6XZZ | Transfer Lower Gingiva, External Approach                    |  |
| Head and Neck | ICD-10-PCS | 0NBT0ZZ | Excision of Right Mandible, Open Approach                    |  |
| Head and Neck | ICD-10-PCS | 0NBT3ZZ | Excision of Right Mandible, Percutaneous Approach            |  |
| Head and Neck | ICD-10-PCS | 0NBT4ZZ | Excision of Right Mandible, Percutaneous Endoscopic Approach |  |
| Head and Neck | ICD-10-PCS | 0NBV0ZZ | Excision of Left Mandible, Open Approach                     |  |
| Head and Neck | ICD-10-PCS | 0NBV3ZZ | Excision of Left Mandible, Percutaneous Approach             |  |
| Head and Neck | ICD-10-PCS | 0NBV4ZZ | Excision of Left Mandible, Percutaneous Endoscopic Approach  |  |

|               |            |         |                                                             |             |
|---------------|------------|---------|-------------------------------------------------------------|-------------|
| Head and Neck | ICD-10-PCS | 0NTC0ZZ | Resection of Right Sphenoid Bone, Open Approach             |             |
| Head and Neck | ICD-10-PCS | 0NTD0ZZ | Resection of Left Sphenoid Bone, Open Approach              |             |
| Head and Neck | ICD-10-PCS | 0NTF0ZZ | Resection of Right Ethmoid Bone, Open Approach              |             |
| Head and Neck | ICD-10-PCS | 0NTG0ZZ | Resection of Left Ethmoid Bone, Open Approach               |             |
| Head and Neck | ICD-10-PCS | 0NTH0ZZ | Resection of Right Lacrimal Bone, Open Approach             |             |
| Head and Neck | ICD-10-PCS | 0NTJ0ZZ | Resection of Left Lacrimal Bone, Open Approach              |             |
| Head and Neck | ICD-10-PCS | 0NTK0ZZ | Resection of Right Palatine Bone, Open Approach             |             |
| Head and Neck | ICD-10-PCS | 0NTL0ZZ | Resection of Left Palatine Bone, Open Approach              |             |
| Head and Neck | ICD-10-PCS | 0NTM0ZZ | Resection of Right Zygomatic Bone, Open Approach            |             |
| Head and Neck | ICD-10-PCS | 0NTN0ZZ | Resection of Left Zygomatic Bone, Open Approach             |             |
| Head and Neck | ICD-10-PCS | 0NTP0ZZ | Resection of Right Orbit, Open Approach                     |             |
| Head and Neck | ICD-10-PCS | 0NTQ0ZZ | Resection of Left Orbit, Open Approach                      |             |
| Head and Neck | ICD-10-PCS | 0NTR0ZZ | Resection of Right Maxilla, Open Approach                   |             |
| Head and Neck | ICD-10-PCS | 0NTS0ZZ | Resection of Left Maxilla, Open Approach                    |             |
| Head and Neck | ICD-10-PCS | 0RTC0ZZ | Resection of Right Temporomandibular Joint, Open Approach   |             |
| Head and Neck | ICD-10-PCS | 0RTD0ZZ | Resection of Left Temporomandibular Joint, Open Approach    |             |
| Head and Neck | CPT        | 21299   | Cranio/maxillofacial surgery                                |             |
| Head and Neck | CPT        | 21554   | Exc neck tum deep 5 cm/>                                    |             |
| Head and Neck | CPT        | 21558   | Resect neck tumor 5 cm/>                                    |             |
| Head and Neck | CPT        | 31420   | Removal of epiglottis                                       |             |
| Head and Neck | CPT        | 31599   | Larynx surgery procedure                                    |             |
| Head and Neck | CPT        | 41120   | Partial removal of tongue                                   |             |
| Head and Neck | CPT        | 42844   | Extensive surgery of throat                                 |             |
| Head and Neck | CPT        | 42890   | Partial removal of pharynx                                  |             |
| Head and Neck | CPT        | 42950   | Reconstruction of throat                                    |             |
| Kidney        | ICD-9-CM   | 55.4    | Partial nephrectomy                                         | Nephrectomy |
| Kidney        | ICD-9-CM   | 55.5    | Total nephrectomy                                           | Nephrectomy |
| Kidney        | ICD-9-CM   | 55.51   | Nephroureterectomy                                          | Nephrectomy |
| Kidney        | ICD-9-CM   | 55.52   | Nephrectomy of remaining kidney                             | Nephrectomy |
| Kidney        | ICD-9-CM   | 55.53   | Removal of transplanted or rejected kidney                  | Nephrectomy |
| Kidney        | ICD-9-CM   | 55.54   | Bilateral nephrectomy                                       | Nephrectomy |
| Kidney        | ICD-10-PCS | 0TB00ZZ | Excision of Right Kidney, Open Approach                     | Nephrectomy |
| Kidney        | ICD-10-PCS | 0TB03ZZ | Excision of Right Kidney, Percutaneous Approach             | Nephrectomy |
| Kidney        | ICD-10-PCS | 0TB04ZZ | Excision of Right Kidney, Percutaneous Endoscopic Approach  | Nephrectomy |
| Kidney        | ICD-10-PCS | 0TB07ZZ | Excision of Right Kidney, Via Natural or Artificial Opening | Nephrectomy |

|        |            |         |                                                                               |             |
|--------|------------|---------|-------------------------------------------------------------------------------|-------------|
| Kidney | ICD-10-PCS | 0TB08ZZ | Excision of Right Kidney, Via Natural or Artificial Opening Endoscopic        | Nephrectomy |
| Kidney | ICD-10-PCS | 0TB10ZZ | Excision of Left Kidney, Open Approach                                        | Nephrectomy |
| Kidney | ICD-10-PCS | 0TB13ZZ | Excision of Left Kidney, Percutaneous Approach                                | Nephrectomy |
| Kidney | ICD-10-PCS | 0TB14ZZ | Excision of Left Kidney, Percutaneous Endoscopic Approach                     | Nephrectomy |
| Kidney | ICD-10-PCS | 0TB17ZZ | Excision of Left Kidney, Via Natural or Artificial Opening                    | Nephrectomy |
| Kidney | ICD-10-PCS | 0TB18ZZ | Excision of Left Kidney, Via Natural or Artificial Opening Endoscopic         | Nephrectomy |
| Kidney | ICD-10-PCS | 0TB30ZZ | Excision of Right Kidney Pelvis, Open Approach                                | Nephrectomy |
| Kidney | ICD-10-PCS | 0TB33ZZ | Excision of Right Kidney Pelvis, Percutaneous Approach                        | Nephrectomy |
| Kidney | ICD-10-PCS | 0TB34ZZ | Excision of Right Kidney Pelvis, Percutaneous Endoscopic Approach             | Nephrectomy |
| Kidney | ICD-10-PCS | 0TB37ZZ | Excision of Right Kidney Pelvis, Via Natural or Artificial Opening            | Nephrectomy |
| Kidney | ICD-10-PCS | 0TB38ZZ | Excision of Right Kidney Pelvis, Via Natural or Artificial Opening Endoscopic | Nephrectomy |
| Kidney | ICD-10-PCS | 0TB40ZZ | Excision of Left Kidney Pelvis, Open Approach                                 | Nephrectomy |
| Kidney | ICD-10-PCS | 0TB43ZZ | Excision of Left Kidney Pelvis, Percutaneous Approach                         | Nephrectomy |
| Kidney | ICD-10-PCS | 0TB44ZZ | Excision of Left Kidney Pelvis, Percutaneous Endoscopic Approach              | Nephrectomy |
| Kidney | ICD-10-PCS | 0TB47ZZ | Excision of Left Kidney Pelvis, Via Natural or Artificial Opening             | Nephrectomy |
| Kidney | ICD-10-PCS | 0TB48ZZ | Excision of Left Kidney Pelvis, Via Natural or Artificial Opening Endoscopic  | Nephrectomy |
| Kidney | ICD-10-PCS | 0TT00ZZ | Resection of Right Kidney, Open Approach                                      | Nephrectomy |
| Kidney | ICD-10-PCS | 0TT04ZZ | Resection of Right Kidney, Percutaneous Endoscopic Approach                   | Nephrectomy |
| Kidney | ICD-10-PCS | 0TT10ZZ | Resection of Left Kidney, Open Approach                                       | Nephrectomy |
| Kidney | ICD-10-PCS | 0TT14ZZ | Resection of Left Kidney, Percutaneous Endoscopic Approach                    | Nephrectomy |
| Kidney | ICD-10-PCS | 0TT20ZZ | Resection of Bilateral Kidneys, Open Approach                                 | Nephrectomy |
| Kidney | ICD-10-PCS | 0TT24ZZ | Resection of Bilateral Kidneys, Percutaneous Endoscopic Approach              | Nephrectomy |
| Kidney | ICD-10-PCS | 0TT30ZZ | Resection of Right Kidney Pelvis, Open Approach                               | Nephrectomy |
| Kidney | ICD-10-PCS | 0TT34ZZ | Resection of Right Kidney Pelvis, Percutaneous Endoscopic                     | Nephrectomy |
| Kidney | ICD-10-PCS | 0TT37ZZ | Resection of Right Kidney Pelvis, Via Natural or Artificial Opening           | Nephrectomy |



|        |            |         |                                                                                                                                                                  |             |
|--------|------------|---------|------------------------------------------------------------------------------------------------------------------------------------------------------------------|-------------|
| Kidney | ICD-10-PCS | 0TT38ZZ | Resection of Right Kidney Pelvis, Via Natural or Artificial Opening Endoscopic                                                                                   | Nephrectomy |
| Kidney | ICD-10-PCS | 0TT40ZZ | Resection of Left Kidney Pelvis, Open Approach                                                                                                                   | Nephrectomy |
| Kidney | ICD-10-PCS | 0TT44ZZ | Resection of Left Kidney Pelvis, Percutaneous Endoscopic Approach                                                                                                | Nephrectomy |
| Kidney | ICD-10-PCS | 0TT47ZZ | Resection of Left Kidney Pelvis, Via Natural or Artificial Opening                                                                                               | Nephrectomy |
| Kidney | ICD-10-PCS | 0TT48ZZ | Resection of Left Kidney Pelvis, Via Natural or Artificial Opening Endoscopic                                                                                    | Nephrectomy |
| Kidney | ICD-10-PCS | 0TT60ZZ | Resection of Right Ureter, Open Approach                                                                                                                         | Nephrectomy |
| Kidney | ICD-10-PCS | 0TT64ZZ | Resection of Right Ureter, Percutaneous Endoscopic Approach                                                                                                      | Nephrectomy |
| Kidney | ICD-10-PCS | 0TT67ZZ | Resection of Right Ureter, Via Natural or Artificial Opening                                                                                                     | Nephrectomy |
| Kidney | ICD-10-PCS | 0TT68ZZ | Resection of Right Ureter, Via Natural or Artificial Opening Endoscopic                                                                                          | Nephrectomy |
| Kidney | ICD-10-PCS | 0TT70ZZ | Resection of Left Ureter, Open Approach                                                                                                                          | Nephrectomy |
| Kidney | ICD-10-PCS | 0TT74ZZ | Resection of Left Ureter, Percutaneous Endoscopic Approach                                                                                                       | Nephrectomy |
| Kidney | ICD-10-PCS | 0TT77ZZ | Resection of Left Ureter, Via Natural or Artificial Opening                                                                                                      | Nephrectomy |
| Kidney | ICD-10-PCS | 0TT78ZZ | Resection of Left Ureter, Via Natural or Artificial Opening Endoscopic                                                                                           | Nephrectomy |
| Kidney | CPT        | 50220   | Nephrectomy, including partial ureterectomy, any open approach including rib resection;                                                                          |             |
| Kidney | CPT        | 50225   | Nephrectomy, including partial ureterectomy, any open approach including rib resection; complicated because of previous surgery on same kidney                   |             |
| Kidney | CPT        | 50230   | Nephrectomy, including partial ureterectomy, any open approach including rib resection; radical, with regional lymphadenectomy and/or vena caval thrombectomy    |             |
| Kidney | CPT        | 50234   | Nephrectomy with total ureterectomy and bladder cuff; through same incision                                                                                      |             |
| Kidney | CPT        | 50236   | Nephrectomy with total ureterectomy and bladder cuff; through separate incision                                                                                  |             |
| Kidney | CPT        | 50240   | Nephrectomy, partial                                                                                                                                             |             |
| Kidney | CPT        | 50543   | Laparoscopic partial nephrectomy                                                                                                                                 |             |
| Kidney | CPT        | 50545   | Laparoscopy, surgical; radical nephrectomy (includes removal of Gerota's fascia and surrounding fatty tissue, removal of regional lymph nodes, and adrenalectomy |             |

|        |            |         |                                                                    |                |
|--------|------------|---------|--------------------------------------------------------------------|----------------|
| Kidney | CPT        | 50546   | Laparoscopy, surgical; nephrectomy, including partial ureterectomy |                |
| Kidney | CPT        | 50548   | Laparoscopy, surgical; nephrectomy with total ureterectomy         |                |
| Liver  | ICD-9-CM   | 50.22   | Partial hepatectomy                                                |                |
| Liver  | ICD-9-CM   | 50.3    | Hepatic lobectomy                                                  |                |
| Liver  | ICD-9-CM   | 50.4    | Total hepatectomy                                                  |                |
| Liver  | ICD-9-CM   | 50.59   | Liver transplant NEC                                               |                |
| Liver  | ICD-9-CM   | 50.99   | Other operations of Liver                                          |                |
| Liver  | ICD-10-PCS | 0FB00ZZ | Excision of Liver, Open Approach                                   |                |
| Liver  | ICD-10-PCS | 0FB03ZZ | Excision of Liver, Percutaneous Approach                           |                |
| Liver  | ICD-10-PCS | 0FB04ZZ | Excision of Liver, Percutaneous Endoscopic Approach                |                |
| Liver  | ICD-10-PCS | 0FT00ZZ | Resection of Liver, Open Approach                                  |                |
| Liver  | ICD-10-PCS | 0FT04ZZ | Resection of Liver, Percutaneous Endoscopic Approach               |                |
| Liver  | ICD-10-PCS | 0FT10ZZ | Resection of Right Lobe Liver, Open Approach                       |                |
| Liver  | ICD-10-PCS | 0FT14ZZ | Resection of Right Lobe Liver, Perc Endo Approach                  |                |
| Liver  | ICD-10-PCS | 0FT20ZZ | Resection of Left Lobe Liver, Open Approach                        |                |
| Liver  | ICD-10-PCS | 0FT24ZZ | Resection of Left Lobe Liver, Perc Endo Approach                   |                |
| Liver  | ICD-10-PCS | 0FY00Z0 | Transplantation of Liver, Allogeneic, Open Approach                |                |
| Liver  | ICD-10-PCS | 0FY00Z1 | Transplantation of Liver, Syngeneic, Open Approach                 |                |
| Liver  | ICD-10-PCS | 0FY00Z2 | Transplantation of Liver, Zooplastic, Open Approach                |                |
| Lung   | ICD-9-CM   | 32.20   | Thoracoscopic excision of lesion or tissue of lung                 | Lung Resection |
| Lung   | ICD-9-CM   | 32.21   | Thoracoscopic excision of lesion or tissue of lung                 | Lung Resection |
| Lung   | ICD-9-CM   | 32.22   | Thoracoscopic excision of lesion or tissue of lung                 | Lung Resection |
| Lung   | ICD-9-CM   | 32.23   | Thoracoscopic excision of lesion or tissue of lung                 | Lung Resection |
| Lung   | ICD-9-CM   | 32.24   | Thoracoscopic excision of lesion or tissue of lung                 | Lung Resection |
| Lung   | ICD-9-CM   | 32.25   | Thoracoscopic excision of lesion or tissue of lung                 | Lung Resection |
| Lung   | ICD-9-CM   | 32.26   | Thoracoscopic excision of lesion or tissue of lung                 | Lung Resection |
| Lung   | ICD-9-CM   | 32.27   | Thoracoscopic excision of lesion or tissue of lung                 | Lung Resection |
| Lung   | ICD-9-CM   | 32.28   | Thoracoscopic excision of lesion or tissue of lung                 | Lung Resection |
| Lung   | ICD-9-CM   | 32.29   | Other local excision or destruction of lesion or tissue of lung    |                |
| Lung   | ICD-9-CM   | 32.30   | Thoracoscopic segmental resection of lung                          | Lung Resection |
| Lung   | ICD-9-CM   | 32.39   | Other and unspecified segmental resection of lung                  | Lung Resection |
| Lung   | ICD-9-CM   | 32.41   | Thoracoscopic lobectomy of lung                                    | Lung Resection |
| Lung   | ICD-9-CM   | 32.49   | Other lobectomy of lung                                            | Lung Resection |

|      |            |         |                                                              |                |
|------|------------|---------|--------------------------------------------------------------|----------------|
| Lung | ICD-9-CM   | 32.50   | Thoracoscopic pneumonectomy                                  | Lung Resection |
| Lung | ICD-9-CM   | 32.59   | Other and unspecified pneumonectomy                          | Lung Resection |
| Lung | ICD-10-PCS | 0B538ZZ | Destruction of Right Main Bronchus, Endo                     |                |
| Lung | ICD-10-PCS | 0B548ZZ | Destruction of Right Upper Lobe Bronchus, Endo               |                |
| Lung | ICD-10-PCS | 0B558ZZ | Destruction of Right Middle Lobe Bronchus, Endo              |                |
| Lung | ICD-10-PCS | 0B568ZZ | Destruction of Right Lower Lobe Bronchus, Endo               |                |
| Lung | ICD-10-PCS | 0B578ZZ | Destruction of Left Main Bronchus, Endo                      |                |
| Lung | ICD-10-PCS | 0B588ZZ | Destruction of Left Upper Lobe Bronchus, Endo                |                |
| Lung | ICD-10-PCS | 0B598ZZ | Destruction of Lingula Bronchus, Endo                        |                |
| Lung | ICD-10-PCS | 0B5B8ZZ | Destruction of Left Lower Lobe Bronchus, Endo                |                |
| Lung | ICD-10-PCS | 0B5K0ZZ | Destruction of Right Lung, Open Approach                     |                |
| Lung | ICD-10-PCS | 0B5K3ZZ | Destruction of Right Lung, Percutaneous Approach             |                |
| Lung | ICD-10-PCS | 0B5K4ZZ | Destruction of Right Lung, Percutaneous Endoscopic Approach  |                |
| Lung | ICD-10-PCS | 0B5K7ZZ | Destruction of Right Lung, Via Natural or Artificial Opening |                |
| Lung | ICD-10-PCS | 0B5K8ZZ | Destruction of Right Lung, Endo                              |                |
| Lung | ICD-10-PCS | 0B5L0ZZ | Destruction of Left Lung, Open Approach                      |                |
| Lung | ICD-10-PCS | 0B5L3ZZ | Destruction of Left Lung, Percutaneous Approach              |                |
| Lung | ICD-10-PCS | 0B5L4ZZ | Destruction of Left Lung, Percutaneous Endoscopic Approach   |                |
| Lung | ICD-10-PCS | 0B5L7ZZ | Destruction of Left Lung, Via Natural or Artificial Opening  |                |
| Lung | ICD-10-PCS | 0B5L8ZZ | Destruction of Left Lung, Endo                               |                |
| Lung | ICD-10-PCS | 0B5M0ZZ | Destruction of Bilateral Lungs, Open Approach                |                |
| Lung | ICD-10-PCS | 0B5M3ZZ | Destruction of Bilateral Lungs, Percutaneous Approach        |                |
| Lung | ICD-10-PCS | 0B5M4ZZ | Destruction of Bilateral Lungs, Perc Endo Approach           |                |
| Lung | ICD-10-PCS | 0B5M7ZZ | Destruction of Bilateral Lungs, Via Opening                  |                |
| Lung | ICD-10-PCS | 0B5M8ZZ | Destruction of Bilateral Lungs, Endo                         |                |
| Lung | ICD-10-PCS | 0BBC4ZZ | Excision of Right Upper Lung Lobe, Perc Endo Approach        | Lung Resection |
| Lung | ICD-10-PCS | 0BBD4ZZ | Excision of Right Middle Lung Lobe, Perc Endo Approach       | Lung Resection |
| Lung | ICD-10-PCS | 0BBF4ZZ | Excision of Right Lower Lung Lobe, Perc Endo Approach        | Lung Resection |
| Lung | ICD-10-PCS | 0BBG4ZZ | Excision of Left Upper Lung Lobe, Perc Endo Approach         | Lung Resection |
| Lung | ICD-10-PCS | 0BBH4ZZ | Excision of Lung Lingula, Percutaneous Endoscopic Approach   | Lung Resection |

|      |            |         |                                                             |                |
|------|------------|---------|-------------------------------------------------------------|----------------|
| Lung | ICD-10-PCS | 0BBJ4ZZ | Excision of Left Lower Lung Lobe, Perc Endo Approach        | Lung Resection |
| Lung | ICD-10-PCS | 0BBK0ZZ | Excision of Right Lung, Open Approach                       | Lung Resection |
| Lung | ICD-10-PCS | 0BBK3ZZ | Excision of Right Lung, Percutaneous Approach               | Lung Resection |
| Lung | ICD-10-PCS | 0BBK4ZZ | Excision of Right Lung, Percutaneous Endoscopic Approach    | Lung Resection |
| Lung | ICD-10-PCS | 0BBK7ZZ | Excision of Right Lung, Via Natural or Artificial Opening   | Lung Resection |
| Lung | ICD-10-PCS | 0BBK8ZZ | Excision of Right Lung, Endo                                | Lung Resection |
| Lung | ICD-10-PCS | 0BBL0ZZ | Excision of Left Lung, Open Approach                        | Lung Resection |
| Lung | ICD-10-PCS | 0BBL3ZZ | Excision of Left Lung, Percutaneous Approach                | Lung Resection |
| Lung | ICD-10-PCS | 0BBL4ZZ | Excision of Left Lung, Percutaneous Endoscopic Approach     | Lung Resection |
| Lung | ICD-10-PCS | 0BBL7ZZ | Excision of Left Lung, Via Natural or Artificial Opening    | Lung Resection |
| Lung | ICD-10-PCS | 0BBL8ZZ | Excision of Left Lung, Endo                                 | Lung Resection |
| Lung | ICD-10-PCS | 0BBM0ZZ | Excision of Bilateral Lungs, Open Approach                  | Lung Resection |
| Lung | ICD-10-PCS | 0BBM3ZZ | Excision of Bilateral Lungs, Percutaneous Approach          | Lung Resection |
| Lung | ICD-10-PCS | 0BBM4ZZ | Excision of Bilateral Lungs, Perc Endo Approach             | Lung Resection |
| Lung | ICD-10-PCS | 0BBM7ZZ | Excision of Bilateral Lungs, Via Opening                    | Lung Resection |
| Lung | ICD-10-PCS | 0BBM8ZZ | Excision of Bilateral Lungs, Endo                           | Lung Resection |
| Lung | ICD-10-PCS | 0BTC0ZZ | Resection of Right Upper Lung Lobe, Open Approach           | Lung Resection |
| Lung | ICD-10-PCS | 0BTC4ZZ | Resection of Right Upper Lung Lobe, Perc Endo Approach      | Lung Resection |
| Lung | ICD-10-PCS | 0BTD0ZZ | Resection of Right Middle Lung Lobe, Open Approach          | Lung Resection |
| Lung | ICD-10-PCS | 0BTD4ZZ | Resection of Right Middle Lung Lobe, Perc Endo Approach     | Lung Resection |
| Lung | ICD-10-PCS | 0BTF0ZZ | Resection of Right Lower Lung Lobe, Open Approach           | Lung Resection |
| Lung | ICD-10-PCS | 0BTF4ZZ | Resection of Right Lower Lung Lobe, Perc Endo Approach      | Lung Resection |
| Lung | ICD-10-PCS | 0BTG0ZZ | Resection of Left Upper Lung Lobe, Open Approach            | Lung Resection |
| Lung | ICD-10-PCS | 0BTG4ZZ | Resection of Left Upper Lung Lobe, Perc Endo Approach       | Lung Resection |
| Lung | ICD-10-PCS | 0BTH0ZZ | Resection of Lung Lingula, Open Approach                    | Lung Resection |
| Lung | ICD-10-PCS | 0BTH4ZZ | Resection of Lung Lingula, Percutaneous Endoscopic Approach | Lung Resection |
| Lung | ICD-10-PCS | 0BTJ0ZZ | Resection of Left Lower Lung Lobe, Open Approach            | Lung Resection |
| Lung | ICD-10-PCS | 0BTJ4ZZ | Resection of Left Lower Lung Lobe, Perc Endo Approach       | Lung Resection |
| Lung | ICD-10-PCS | 0BTK0ZZ | Resection of Right Lung, Open Approach                      | Lung Resection |
| Lung | ICD-10-PCS | 0BTK4ZZ | Resection of Right Lung, Percutaneous Endoscopic Approach   | Lung Resection |

|         |            |         |                                                                                           |                |
|---------|------------|---------|-------------------------------------------------------------------------------------------|----------------|
| Lung    | ICD-10-PCS | 0BTL0ZZ | Resection of Left Lung, Open Approach                                                     | Lung Resection |
| Lung    | ICD-10-PCS | 0BTL4ZZ | Resection of Left Lung, Percutaneous Endoscopic Approach                                  | Lung Resection |
| Lung    | ICD-10-PCS | 0BTM0ZZ | Resection of Bilateral Lungs, Open Approach                                               | Lung Resection |
| Lung    | ICD-10-PCS | 0BTM4ZZ | Resection of Bilateral Lungs, Perc Endo Approach                                          | Lung Resection |
| Ovarian | ICD-9-CM   | 65.49   | Oth uni salpingo-oophor                                                                   |                |
| Ovarian | ICD-9-CM   | 65.51   | Oth remove both ovaries                                                                   |                |
| Ovarian | ICD-9-CM   | 65.52   | Oth remove remain ovary                                                                   |                |
| Ovarian | ICD-9-CM   | 65.53   | Lap remove both ovaries                                                                   |                |
| Ovarian | ICD-9-CM   | 65.61   | Oth remove ovaries/tubes                                                                  |                |
| Ovarian | ICD-9-CM   | 65.62   | Oth remove rem ova/tube                                                                   |                |
| Ovarian | ICD-9-CM   | 68.31   | Lap scervic hysterectomy                                                                  |                |
| Ovarian | ICD-9-CM   | 68.39   | Subtotl abd hyst NEC/NOS                                                                  |                |
| Ovarian | ICD-9-CM   | 68.41   | Lap total abdominal hyst                                                                  |                |
| Ovarian | ICD-9-CM   | 68.49   | Total abd hyst NEC/NOS                                                                    |                |
| Ovarian | ICD-9-CM   | 68.51   | Lap ast vag hysterectomy                                                                  |                |
| Ovarian | ICD-9-CM   | 68.61   | Lap radical abdomnl hyst                                                                  |                |
| Ovarian | ICD-9-CM   | 68.69   | Radical abd hyst NEC/NOS                                                                  |                |
| Ovarian | ICD-9-CM   | 68.71   | Lap radical vaginal hyst                                                                  |                |
| Ovarian | ICD-9-CM   | 68.79   | Radical vag hyst NEC/NOS                                                                  |                |
| Ovarian | ICD-9-CM   | 68.8    | Pelvic evisceration                                                                       |                |
| Ovarian | ICD-9-CM   | 68.9    | Hysterectomy NEC/NOS                                                                      |                |
| Ovarian | ICD-10-PCS | 0TTB0ZZ | Resection of Bladder, Open Approach                                                       | Cystectomy     |
| Ovarian | ICD-10-PCS | 0TTD0ZZ | Resection of Urethra, Open Approach                                                       |                |
| Ovarian | ICD-10-PCS | 0U508ZZ | Destruction of Right Ovary, Via Natural or Artificial Opening Endoscopic                  |                |
| Ovarian | ICD-10-PCS | 0U518ZZ | Destruction of Left Ovary, Via Natural or Artificial Opening Endoscopic                   |                |
| Ovarian | ICD-10-PCS | 0U528ZZ | Destruction of Bilateral Ovaries, Via Natural or Artificial Opening Endoscopic            |                |
| Ovarian | ICD-10-PCS | 0U548ZZ | Destruction of Uterine Supporting Structure, Via Natural or Artificial Opening Endoscopic |                |
| Ovarian | ICD-10-PCS | 0UT00ZZ | Resection of Right Ovary, Open Approach                                                   |                |
| Ovarian | ICD-10-PCS | 0UT07ZZ | Resection of Right Ovary, Via Natural or Artificial Opening                               |                |
| Ovarian | ICD-10-PCS | 0UT08ZZ | Resection of Right Ovary, Endo                                                            |                |
| Ovarian | ICD-10-PCS | 0UT0FZZ | Resection of Right Ovary, Via Opening w Perc Endo                                         |                |
| Ovarian | ICD-10-PCS | 0UT10ZZ | Resection of Left Ovary, Open Approach                                                    |                |
| Ovarian | ICD-10-PCS | 0UT17ZZ | Resection of Left Ovary, Via Natural or Artificial Opening                                |                |
| Ovarian | ICD-10-PCS | 0UT18ZZ | Resection of Left Ovary, Endo                                                             |                |
| Ovarian | ICD-10-PCS | 0UT1FZZ | Resection of Left Ovary, Via Opening w Perc Endo                                          |                |
| Ovarian | ICD-10-PCS | 0UT20ZZ | Resection of Bilateral Ovaries, Open Approach                                             |                |
| Ovarian | ICD-10-PCS | 0UT24ZZ | Resection of Bilateral Ovaries, Perc Endo Approach                                        |                |

|            |            |         |                                                                                                               |                |
|------------|------------|---------|---------------------------------------------------------------------------------------------------------------|----------------|
| Ovarian    | ICD-10-PCS | 0UT27ZZ | Resection of Bilateral Ovaries, Via Opening                                                                   |                |
| Ovarian    | ICD-10-PCS | 0UT28ZZ | Resection of Bilateral Ovaries, Endo                                                                          |                |
| Ovarian    | ICD-10-PCS | 0UT2FZZ | Resection of Bilateral Ovaries, Via Opening w Perc Endo                                                       |                |
| Ovarian    | ICD-10-PCS | 0UT40ZZ | Resection of Uterine Supporting Structure, Open Approach                                                      |                |
| Ovarian    | ICD-10-PCS | 0UT44ZZ | Resection of Uterine Support Struct, Perc Endo Approach                                                       |                |
| Ovarian    | ICD-10-PCS | 0UT70ZZ | Resection of Bilateral Fallopian Tubes, Open Approach                                                         |                |
| Ovarian    | ICD-10-PCS | 0UT90ZL | Resection of Uterus, Supracervical, Open Approach                                                             |                |
| Ovarian    | ICD-10-PCS | 0UT90ZZ | Resection of Uterus, Open Approach                                                                            |                |
| Ovarian    | ICD-10-PCS | 0UT94ZL | Resection of Uterus, Supracervical, Percutaneous Endoscopic Approach                                          |                |
| Ovarian    | ICD-10-PCS | 0UT94ZZ | Resection of Uterus, Percutaneous Endoscopic Approach                                                         |                |
| Ovarian    | ICD-10-PCS | 0UT97ZL | Resection of Uterus, Supracervical, Via Natural or Artificial Opening                                         |                |
| Ovarian    | ICD-10-PCS | 0UT97ZZ | Resection of Uterus, Via Natural or Artificial Opening                                                        |                |
| Ovarian    | ICD-10-PCS | 0UT98ZL | Resection of Uterus, Supracervical, Via Natural or Artificial Opening Endoscopic                              |                |
| Ovarian    | ICD-10-PCS | 0UT98ZZ | Resection of Uterus, Endo                                                                                     |                |
| Ovarian    | ICD-10-PCS | 0UT9FZL | Resection of Uterus, Supracervical, Via Natural or Artificial Opening With Percutaneous Endoscopic Assistance |                |
| Ovarian    | ICD-10-PCS | 0UT9FZZ | Resection of Uterus, Via Opening w Perc Endo                                                                  |                |
| Ovarian    | ICD-10-PCS | 0UTC0ZZ | Resection of Cervix, Open Approach                                                                            |                |
| Ovarian    | ICD-10-PCS | 0UTC4ZZ | Resection of Cervix, Percutaneous Endoscopic Approach                                                         |                |
| Ovarian    | ICD-10-PCS | 0UTC7ZZ | Resection of Cervix, Via Natural or Artificial Opening                                                        |                |
| Ovarian    | ICD-10-PCS | 0UTC8ZZ | Resection of Cervix, Endo                                                                                     |                |
| Ovarian    | ICD-10-PCS | 0UTG0ZZ | Resection of Vagina, Open Approach                                                                            |                |
| Ovarian    | CPT        | 58548   | Lap radical hyst                                                                                              |                |
| Ovarian    | CPT        | 58550   | Laparo-asst vag hysterectomy                                                                                  |                |
| Ovarian    | CPT        | 58552   | Laparo-vag hyst incl t/o                                                                                      |                |
| Ovarian    | CPT        | 58950   | Resect ovarian malignancy                                                                                     |                |
| Ovarian    | CPT        | 58953   | Tah rad dissect for debulk                                                                                    |                |
| Pancreatic | ICD-9-CM   | 52.51   | Proximal pancreatectomy                                                                                       | Pancreatectomy |
| Pancreatic | ICD-9-CM   | 52.52   | Distal pancreatectomy                                                                                         | Pancreatectomy |
| Pancreatic | ICD-9-CM   | 52.53   | Radical subtotal pancreatectomy                                                                               | Pancreatectomy |
| Pancreatic | ICD-9-CM   | 52.59   | Other partial pancreatectomy                                                                                  | Pancreatectomy |
| Pancreatic | ICD-9-CM   | 52.6    | Total pancreatectomy                                                                                          | Pancreatectomy |
| Pancreatic | ICD-9-CM   | 52.7    | Rad pancreaticoduodenect                                                                                      | Pancreatectomy |

|            |            |         |                                                                        |                |
|------------|------------|---------|------------------------------------------------------------------------|----------------|
| Pancreatic | ICD-10-PCS | 0FBG0ZZ | Excision of Pancreas, Open Approach                                    | Pancreatectomy |
| Pancreatic | ICD-10-PCS | 0FBG3ZZ | Excision of Pancreas, Percutaneous Approach                            | Pancreatectomy |
| Pancreatic | ICD-10-PCS | 0FBG4ZZ | Excision of Pancreas, Percutaneous Endoscopic Approach                 | Pancreatectomy |
| Pancreatic | ICD-10-PCS | 0FBG8ZZ | Excision of Pancreas, Via Natural or Artificial Opening Endoscopic     | Pancreatectomy |
| Pancreatic | ICD-10-PCS | 0FTG0ZZ | Resection of Pancreas, Open Approach                                   | Pancreatectomy |
| Pancreatic | ICD-10-PCS | 0FTG4ZZ | Resection of Pancreas, Percutaneous Endoscopic Approach                | Pancreatectomy |
| Pancreatic | CPT        | 48999   | Pancreas surgery procedure                                             |                |
| Prostate   | ICD-9-CM   | 57.71   | Pelvic exenteration                                                    | Cystectomy     |
| Prostate   | ICD-9-CM   | 60.21   | Transureth prostatectomy                                               |                |
| Prostate   | ICD-9-CM   | 60.29   | Oth transureth prostatec                                               |                |
| Prostate   | ICD-9-CM   | 60.3    | Suprapubic prostatectomy                                               |                |
| Prostate   | ICD-9-CM   | 60.4    | Retropubic prostatectomy                                               |                |
| Prostate   | ICD-9-CM   | 60.5    | Radical prostatectomy                                                  |                |
| Prostate   | ICD-9-CM   | 60.69   | Other prostatectomy                                                    |                |
| Prostate   | ICD-10-PCS | 0TTB0ZZ | Resection of Bladder, Open Approach                                    | Cystectomy     |
| Prostate   | ICD-10-PCS | 0TTB4ZZ | Resection of Bladder, Percutaneous Endoscopic Approach                 | Cystectomy     |
| Prostate   | ICD-10-PCS | 0TTB7ZZ | Resection of Bladder, Via Natural or Artificial Opening                | Cystectomy     |
| Prostate   | ICD-10-PCS | 0TTB8ZZ | Resection of Bladder, Endo                                             | Cystectomy     |
| Prostate   | ICD-10-PCS | 0TTD0ZZ | Resection of Urethra, Open Approach                                    |                |
| Prostate   | ICD-10-PCS | 0TTD4ZZ | Resection of Urethra, Percutaneous Endoscopic Approach                 |                |
| Prostate   | ICD-10-PCS | 0TTD7ZZ | Resection of Urethra, Via Natural or Artificial Opening                |                |
| Prostate   | ICD-10-PCS | 0TTD8ZZ | Resection of Urethra, Endo                                             |                |
| Prostate   | ICD-10-PCS | 0V507ZZ | Destruction of Prostate, Via Natural or Artificial Opening             |                |
| Prostate   | ICD-10-PCS | 0V508ZZ | Destruction of Prostate, Endo                                          |                |
| Prostate   | ICD-10-PCS | 0VB07ZZ | Excision of Prostate, Via Natural or Artificial Opening                |                |
| Prostate   | ICD-10-PCS | 0VB08ZZ | Excision of Prostate, Endo                                             |                |
| Prostate   | ICD-10-PCS | 0VT00ZZ | Resection of Prostate, Open Approach                                   |                |
| Prostate   | ICD-10-PCS | 0VT04ZZ | Resection of Prostate, Percutaneous Endoscopic Approach                |                |
| Prostate   | ICD-10-PCS | 0VT07ZZ | Resection of Prostate, Via Natural or Artificial Opening               |                |
| Prostate   | ICD-10-PCS | 0VT08ZZ | Resection of Prostate, Endo                                            |                |
| Prostate   | ICD-10-PCS | 0VT30ZZ | Resection of Bilateral Seminal Vesicles, Open Approach                 |                |
| Prostate   | ICD-10-PCS | 0VT34ZZ | Resection of Bilateral Seminal Vesicles, Perc Endo Approach            |                |
| Prostate   | CPT        | 52601   | Prostatectomy (TURP)                                                   |                |
| Prostate   | CPT        | 52648   | Laser surgery of prostate                                              |                |
| Prostate   | CPT        | 55845   | Prostatectomy, retropubic radical, with or without nerve sparing; with |                |

|                              |          |       |                                                                                              |           |
|------------------------------|----------|-------|----------------------------------------------------------------------------------------------|-----------|
|                              |          |       | bilateral pelvic lymphadenectomy, including external iliac, hypogastric, and obturator nodes |           |
| Prostate                     | CPT      | 55874 | Transperineal placement biodegrad mat, injections, perioprostatic                            |           |
| Small Intestine / Colorectal | ICD-9-CM | 17.31 | Laparoscopic multiple segmental resection of large intestine                                 | Colectomy |
| Small Intestine / Colorectal | ICD-9-CM | 17.32 | Laparoscopic cecectomy                                                                       | Colectomy |
| Small Intestine / Colorectal | ICD-9-CM | 17.33 | Laparoscopic right hemicolectomy                                                             | Colectomy |
| Small Intestine / Colorectal | ICD-9-CM | 17.34 | Laparoscopic resection of transverse colon                                                   | Colectomy |
| Small Intestine / Colorectal | ICD-9-CM | 17.35 | Laparoscopic left hemicolectomy                                                              | Colectomy |
| Small Intestine / Colorectal | ICD-9-CM | 17.36 | Laparoscopic sigmoidectomy                                                                   | Colectomy |
| Small Intestine / Colorectal | ICD-9-CM | 17.39 | Other laparoscopic partial excision of large intestine                                       | Colectomy |
| Small Intestine / Colorectal | ICD-9-CM | 17.42 | Lap robotic assist proc                                                                      |           |
| Small Intestine / Colorectal | ICD-9-CM | 44.39 | Gastroenterostomy NEC                                                                        |           |
| Small Intestine / Colorectal | ICD-9-CM | 45.22 | Endosc lg bowel thru st                                                                      |           |
| Small Intestine / Colorectal | ICD-9-CM | 45.62 | Part sm bowel resect NEC                                                                     |           |
| Small Intestine / Colorectal | ICD-9-CM | 45.71 | Open and other multiple segmental resection of large intestine                               | Colectomy |
| Small Intestine / Colorectal | ICD-9-CM | 45.72 | Open and other cecectomy                                                                     | Colectomy |
| Small Intestine / Colorectal | ICD-9-CM | 45.73 | Open and other right hemicolectomy                                                           | Colectomy |
| Small Intestine / Colorectal | ICD-9-CM | 45.74 | Open and other resection of transverse colon                                                 | Colectomy |
| Small Intestine / Colorectal | ICD-9-CM | 45.75 | Open and other left hemicolectomy                                                            | Colectomy |
| Small Intestine / Colorectal | ICD-9-CM | 45.76 | Open and other sigmoidectomy                                                                 | Colectomy |
| Small Intestine / Colorectal | ICD-9-CM | 45.79 | Other and unspecified partial excision of large intestine                                    | Colectomy |
| Small Intestine / Colorectal | ICD-9-CM | 45.81 | Laparoscopic total intra-abdominal colectomy                                                 | Colectomy |
| Small Intestine / Colorectal | ICD-9-CM | 45.82 | Open total intra-abdominal colectomy                                                         | Colectomy |
| Small Intestine / Colorectal | ICD-9-CM | 45.83 | Other and unspecified total intra-abdominal colectomy                                        | Colectomy |
| Small Intestine / Colorectal | ICD-9-CM | 46.04 | Resect ext seg lg bowel                                                                      | Colectomy |
| Small Intestine / Colorectal | ICD-9-CM | 46.51 | Sm bowel stoma closure                                                                       |           |
| Small Intestine / Colorectal | ICD-9-CM | 46.52 | Lg bowel stoma closure                                                                       |           |
| Small Intestine / Colorectal | ICD-9-CM | 48.65 | Duhamel rectal resection                                                                     |           |
| Small Intestine / Colorectal | ICD-9-CM | 50.23 | Opn abltn liver les/tiss                                                                     |           |
| Small Intestine / Colorectal | ICD-9-CM | 50.24 | Perc abltn liver les/tis                                                                     |           |



|                              |            |         |                                                                                                             |           |
|------------------------------|------------|---------|-------------------------------------------------------------------------------------------------------------|-----------|
| Small Intestine / Colorectal | ICD-9-CM   | 50.25   | Lap abltn liver les/tiss                                                                                    |           |
| Small Intestine / Colorectal | ICD-9-CM   | 50.26   | Abltn liver les/tiss NEC                                                                                    |           |
| Small Intestine / Colorectal | ICD-9-CM   | 50.29   | Other destruction of lesion of liver                                                                        |           |
| Small Intestine / Colorectal | ICD-10-PCS | 0D16079 | Bypass Stomach to Duodenum with Autol Sub, Open Approach                                                    |           |
| Small Intestine / Colorectal | ICD-10-PCS | 0D1607A | Bypass Stomach to Jejunum with Autol Sub, Open Approach                                                     |           |
| Small Intestine / Colorectal | ICD-10-PCS | 0D160J9 | Bypass Stomach to Duodenum with Synth Sub, Open Approach                                                    |           |
| Small Intestine / Colorectal | ICD-10-PCS | 0D160JA | Bypass Stomach to Jejunum with Synth Sub, Open Approach                                                     |           |
| Small Intestine / Colorectal | ICD-10-PCS | 0D160K9 | Bypass Stomach to Duodenum with Nonaut Sub, Open Approach                                                   |           |
| Small Intestine / Colorectal | ICD-10-PCS | 0D160KA | Bypass Stomach to Jejunum with Nonaut Sub, Open Approach                                                    |           |
| Small Intestine / Colorectal | ICD-10-PCS | 0D160Z9 | Bypass Stomach to Duodenum, Open Approach                                                                   |           |
| Small Intestine / Colorectal | ICD-10-PCS | 0D160ZA | Bypass Stomach to Jejunum, Open Approach                                                                    |           |
| Small Intestine / Colorectal | ICD-10-PCS | 0D16879 | Bypass Stomach to Duodenum with Autol Sub, Endo                                                             |           |
| Small Intestine / Colorectal | ICD-10-PCS | 0D1687A | Bypass Stomach to Jejunum with Autol Sub, Endo                                                              |           |
| Small Intestine / Colorectal | ICD-10-PCS | 0D168J9 | Bypass Stomach to Duodenum with Synthetic Substitute, Endo                                                  |           |
| Small Intestine / Colorectal | ICD-10-PCS | 0D168JA | Bypass Stomach to Jejunum with Synthetic Substitute, Endo                                                   |           |
| Small Intestine / Colorectal | ICD-10-PCS | 0D168K9 | Bypass Stomach to Duodenum with Nonaut Sub, Endo                                                            |           |
| Small Intestine / Colorectal | ICD-10-PCS | 0D168KA | Bypass Stomach to Jejunum with Nonaut Sub, Endo                                                             |           |
| Small Intestine / Colorectal | ICD-10-PCS | 0D168Z9 | Bypass Stomach to Duodenum, Endo                                                                            |           |
| Small Intestine / Colorectal | ICD-10-PCS | 0D168ZA | Bypass Stomach to Jejunum, Endo                                                                             |           |
| Small Intestine / Colorectal | ICD-10-PCS | 0DBE0ZZ | Excision of Large Intestine, Open Approach                                                                  | Colectomy |
| Small Intestine / Colorectal | ICD-10-PCS | 0DBE3ZZ | Excision of Large Intestine, Percutaneous Approach                                                          | Colectomy |
| Small Intestine / Colorectal | ICD-10-PCS | 0DBE4ZZ | Excision of Large Intestine, Perc Endo Approach                                                             | Colectomy |
| Small Intestine / Colorectal | ICD-10-PCS | 0DBE7ZZ | Excision of Large Intestine, Via Opening                                                                    | Colectomy |
| Small Intestine / Colorectal | ICD-10-PCS | 0DBE8ZZ | Excision of Large Intestine, Endo                                                                           | Colectomy |
| Small Intestine / Colorectal | ICD-10-PCS | 0DBF0ZZ | Excision of Right Large Intestine, Open Approach                                                            | Colectomy |
| Small Intestine / Colorectal | ICD-10-PCS | 0DBG0ZZ | Excision of Left Large Intestine, Open Approach                                                             | Colectomy |
| Small Intestine / Colorectal | ICD-10-PCS | 0DBGFZZ | Excision of Left Large Intestine, Via Natural or Artificial Opening With Percutaneous Endoscopic Assistance | Colectomy |
| Small Intestine / Colorectal | ICD-10-PCS | 0DBK0ZZ | Excision of Ascending Colon, Open Approach                                                                  | Colectomy |
| Small Intestine / Colorectal | ICD-10-PCS | 0DBL0ZZ | Excision of Transverse Colon, Open Approach                                                                 | Colectomy |

|                              |            |         |                                                                                                         |           |
|------------------------------|------------|---------|---------------------------------------------------------------------------------------------------------|-----------|
| Small Intestine / Colorectal | ICD-10-PCS | 0DBLFZZ | Excision of Transverse Colon, Via Natural or Artificial Opening With Percutaneous Endoscopic Assistance | Colectomy |
| Small Intestine / Colorectal | ICD-10-PCS | 0DBM0ZZ | Excision of Descending Colon, Open Approach                                                             | Colectomy |
| Small Intestine / Colorectal | ICD-10-PCS | 0DBMFZZ | Excision of Descending Colon, Via Natural or Artificial Opening With Percutaneous Endoscopic Assistance | Colectomy |
| Small Intestine / Colorectal | ICD-10-PCS | 0DBN0ZZ | Excision of Sigmoid Colon, Open Approach                                                                | Colectomy |
| Small Intestine / Colorectal | ICD-10-PCS | 0DBNFZZ | Excision of Sigmoid Colon, Via Natural or Artificial Opening With Percutaneous Endoscopic Assistance    | Colectomy |
| Small Intestine / Colorectal | ICD-10-PCS | 0DJD8ZZ | Inspection of Lower Intestinal Tract, Endo                                                              |           |
| Small Intestine / Colorectal | ICD-10-PCS | 0DT90ZZ | Resection of Duodenum, Open Approach                                                                    |           |
| Small Intestine / Colorectal | ICD-10-PCS | 0DT94ZZ | Resection of Duodenum, Percutaneous Endoscopic Approach                                                 |           |
| Small Intestine / Colorectal | ICD-10-PCS | 0DT97ZZ | Resection of Duodenum, Via Natural or Artificial Opening                                                |           |
| Small Intestine / Colorectal | ICD-10-PCS | 0DT98ZZ | Resection of Duodenum, Endo                                                                             |           |
| Small Intestine / Colorectal | ICD-10-PCS | 0DTA0ZZ | Resection of Jejunum, Open Approach                                                                     |           |
| Small Intestine / Colorectal | ICD-10-PCS | 0DTA4ZZ | Resection of Jejunum, Percutaneous Endoscopic Approach                                                  |           |
| Small Intestine / Colorectal | ICD-10-PCS | 0DTA7ZZ | Resection of Jejunum, Via Natural or Artificial Opening                                                 |           |
| Small Intestine / Colorectal | ICD-10-PCS | 0DTA8ZZ | Resection of Jejunum, Endo                                                                              |           |
| Small Intestine / Colorectal | ICD-10-PCS | 0DTB0ZZ | Resection of Ileum, Open Approach                                                                       |           |
| Small Intestine / Colorectal | ICD-10-PCS | 0DTB4ZZ | Resection of Ileum, Percutaneous Endoscopic Approach                                                    |           |
| Small Intestine / Colorectal | ICD-10-PCS | 0DTB7ZZ | Resection of Ileum, Via Natural or Artificial Opening                                                   |           |
| Small Intestine / Colorectal | ICD-10-PCS | 0DTB8ZZ | Resection of Ileum, Endo                                                                                |           |
| Small Intestine / Colorectal | ICD-10-PCS | 0DTE0ZZ | Resection of Large Intestine, Open Approach                                                             | Colectomy |
| Small Intestine / Colorectal | ICD-10-PCS | 0DTE4ZZ | Resection of Large Intestine, Perc Endo Approach                                                        | Colectomy |
| Small Intestine / Colorectal | ICD-10-PCS | 0DTE7ZZ | Resection of Large Intestine, Via Opening                                                               | Colectomy |
| Small Intestine / Colorectal | ICD-10-PCS | 0DTE8ZZ | Resection of Large Intestine, Endo                                                                      | Colectomy |
| Small Intestine / Colorectal | ICD-10-PCS | 0DTF0ZZ | Resection of Right Large Intestine, Open Approach                                                       | Colectomy |
| Small Intestine / Colorectal | ICD-10-PCS | 0DTF4ZZ | Resection of Right Large Intestine, Perc Endo Approach                                                  | Colectomy |
| Small Intestine / Colorectal | ICD-10-PCS | 0DTF7ZZ | Resection of Right Large Intestine, Via Opening                                                         | Colectomy |
| Small Intestine / Colorectal | ICD-10-PCS | 0DTF8ZZ | Resection of Right Large Intestine, Endo                                                                | Colectomy |

|                              |            |         |                                                                                                              |           |
|------------------------------|------------|---------|--------------------------------------------------------------------------------------------------------------|-----------|
| Small Intestine / Colorectal | ICD-10-PCS | 0DTG0ZZ | Resection of Left Large Intestine, Open Approach                                                             | Colectomy |
| Small Intestine / Colorectal | ICD-10-PCS | 0DTG4ZZ | Resection of Left Large Intestine, Perc Endo Approach                                                        | Colectomy |
| Small Intestine / Colorectal | ICD-10-PCS | 0DTG7ZZ | Resection of Left Large Intestine, Via Opening                                                               | Colectomy |
| Small Intestine / Colorectal | ICD-10-PCS | 0DTG8ZZ | Resection of Left Large Intestine, Endo                                                                      | Colectomy |
| Small Intestine / Colorectal | ICD-10-PCS | 0DTGFZZ | Resection of Left Large Intestine, Via Natural or Artificial Opening With Percutaneous Endoscopic Assistance | Colectomy |
| Small Intestine / Colorectal | ICD-10-PCS | 0DTH0ZZ | Resection of Cecum, Open Approach                                                                            | Colectomy |
| Small Intestine / Colorectal | ICD-10-PCS | 0DTH4ZZ | Resection of Cecum, Percutaneous Endoscopic Approach                                                         | Colectomy |
| Small Intestine / Colorectal | ICD-10-PCS | 0DTH7ZZ | Resection of Cecum, Via Natural or Artificial Opening                                                        | Colectomy |
| Small Intestine / Colorectal | ICD-10-PCS | 0DTH8ZZ | Resection of Cecum, Endo                                                                                     | Colectomy |
| Small Intestine / Colorectal | ICD-10-PCS | 0DTK0ZZ | Resection of Ascending Colon, Open Approach                                                                  | Colectomy |
| Small Intestine / Colorectal | ICD-10-PCS | 0DTK4ZZ | Resection of Ascending Colon, Percutaneous Endoscopic Approach                                               | Colectomy |
| Small Intestine / Colorectal | ICD-10-PCS | 0DTK7ZZ | Resection of Ascending Colon, Via Natural or Artificial Opening                                              | Colectomy |
| Small Intestine / Colorectal | ICD-10-PCS | 0DTK8ZZ | Resection of Ascending Colon, Via Natural or Artificial Opening Endoscopic                                   | Colectomy |
| Small Intestine / Colorectal | ICD-10-PCS | 0DTL0ZZ | Resection of Transverse Colon, Open Approach                                                                 | Colectomy |
| Small Intestine / Colorectal | ICD-10-PCS | 0DTL4ZZ | Resection of Transverse Colon, Perc Endo Approach                                                            | Colectomy |
| Small Intestine / Colorectal | ICD-10-PCS | 0DTL7ZZ | Resection of Transverse Colon, Via Opening                                                                   | Colectomy |
| Small Intestine / Colorectal | ICD-10-PCS | 0DTL8ZZ | Resection of Transverse Colon, Endo                                                                          | Colectomy |
| Small Intestine / Colorectal | ICD-10-PCS | 0DTLFZZ | Resection of Transverse Colon, Via Natural or Artificial Opening With Percutaneous Endoscopic Assistance     | Colectomy |
| Small Intestine / Colorectal | ICD-10-PCS | 0DTM0ZZ | Resection of Descending Colon, Open Approach                                                                 | Colectomy |
| Small Intestine / Colorectal | ICD-10-PCS | 0DTM4ZZ | Resection of Descending Colon, Percutaneous Endoscopic Approach                                              | Colectomy |
| Small Intestine / Colorectal | ICD-10-PCS | 0DTM7ZZ | Resection of Descending Colon, Via Natural or Artificial Opening                                             | Colectomy |
| Small Intestine / Colorectal | ICD-10-PCS | 0DTM8ZZ | Resection of Descending Colon, Via Natural or Artificial Opening Endoscopic                                  | Colectomy |
| Small Intestine / Colorectal | ICD-10-PCS | 0DTMFZZ | Resection of Descending Colon, Via Natural or Artificial Opening With Percutaneous Endoscopic Assistance     | Colectomy |
| Small Intestine / Colorectal | ICD-10-PCS | 0DTN0ZZ | Resection of Sigmoid Colon, Open Approach                                                                    | Colectomy |

|                              |            |         |                                                                                                       |           |
|------------------------------|------------|---------|-------------------------------------------------------------------------------------------------------|-----------|
| Small Intestine / Colorectal | ICD-10-PCS | 0DTN4ZZ | Resection of Sigmoid Colon, Percutaneous Endoscopic Approach                                          | Colectomy |
| Small Intestine / Colorectal | ICD-10-PCS | 0DTN7ZZ | Resection of Sigmoid Colon, Via Opening                                                               | Colectomy |
| Small Intestine / Colorectal | ICD-10-PCS | 0DTN8ZZ | Resection of Sigmoid Colon, Endo                                                                      | Colectomy |
| Small Intestine / Colorectal | ICD-10-PCS | 0DTNFZZ | Resection of Sigmoid Colon, Via Natural or Artificial Opening With Percutaneous Endoscopic Assistance | Colectomy |
| Small Intestine / Colorectal | ICD-10-PCS | 0DTP0ZZ | Resection of Rectum, Open Approach                                                                    | Colectomy |
| Small Intestine / Colorectal | ICD-10-PCS | 0DTP4ZZ | Resection of Rectum, Percutaneous Endoscopic Approach                                                 | Colectomy |
| Small Intestine / Colorectal | ICD-10-PCS | 0F500ZZ | Destruction of Liver, Open Approach                                                                   |           |
| Small Intestine / Colorectal | ICD-10-PCS | 0F503ZZ | Destruction of Liver, Percutaneous Approach                                                           |           |
| Small Intestine / Colorectal | ICD-10-PCS | 0F504ZZ | Destruction of Liver, Percutaneous Endoscopic Approach                                                |           |
| Small Intestine / Colorectal | ICD-10-PCS | 8E0W4CZ | Robotic Assisted Procedure of Trunk, Perc Endo Approach                                               |           |
| Small Intestine / Colorectal | CPT        | 44120   | Removal of small intestine                                                                            |           |
| Small Intestine / Colorectal | CPT        | 44140   | Partial removal of colon                                                                              |           |
| Small Intestine / Colorectal | CPT        | 44204   | Laparo partial colectomy                                                                              |           |
| Small Intestine / Colorectal | CPT        | 44207   | L colectomy/coloproctostomy                                                                           |           |
| Small Intestine / Colorectal | CPT        | 45123   | Partial proctectomy                                                                                   |           |
| Small Intestine / Colorectal | CPT        | 47100   | Wedge biopsy of liver                                                                                 |           |
| Small Intestine / Colorectal | CPT        | 47120   | Hepatectomy, resection of liver; partial lobectomy                                                    |           |
| Small Intestine / Colorectal | CPT        | 47370   | Laparo ablate liver tumor rf                                                                          |           |
| Small Intestine / Colorectal | CPT        | 47382   | Percut ablate liver rf                                                                                |           |

## eReferences

1. Oncology Care Model, Center for Medicare & Medicaid Innovation. <https://innovation.cms.gov/innovation-models/oncology-care>. Accessed May 28<sup>th</sup>, 2020.
2. Aliu O, Lee AW, Efron J, Higgins R, Butler C, Offodile A. Assessment of costs and care quality associated with major surgical procedures after implementation of Maryland's capitated budget model. *JAMA Netw open*. 2021;4(9):e2126619.
3. Spetz J, Donaldson N, Aydin C, Brown DS. How many nurses per patient? Measurements of nurse staffing in health services research. *Health Serv Res*. 2008 Oct;43(5 Pt 1):1674-92. doi: 10.1111/j.1475-6773.2008.00850.x. Epub 2008 May 5. PMID: 18459953; PMCID: PMC2653880.
4. Schmitt M. Do hospital mergers reduce costs? *J Health Econ*. 2017 Mar;52:74-94. doi: 10.1016/j.jhealeco.2017.01.007. Epub 2017 Feb 7. PMID: 28236720.
